1 **Three new species of nematodes from the syconia of *Ficus racemosa* in southern India**

2

3

4

**Satyajeet Gupta<sup>1</sup>, Qudsia Tahseen<sup>2</sup>, Renee M. Borges<sup>1\*</sup>**

5

**<sup>1</sup>Centre for Ecological Sciences, Indian Institute of Science, Bangalore 560012, India**

6

**<sup>2</sup>Department of Zoology, Aligarh Muslim University, Aligarh 202002, India**

7

**\* Corresponding author; email: [renee@iisc.ac.in](mailto:renee@iisc.ac.in)**

8

9

10 **Summary** – *Ficus racemosa* with an Indo-Australasian distribution, has so far been recorded to  
11 harbour in its fruits, nematode species of the aphelenchoid genera *Schistonchus*, *Ficophagus* and  
12 *Martininema*, and species of diplogastrid genera *Teratodiplogaster* and *Pristionchus*. The Indian  
13 species reported so far from *Ficus racemosa* lack comprehensive details on morphology and  
14 molecular characterization. In this paper, we describe three new species of nematodes obtained  
15 from syconia (enclosed globular infructescence or fruit) of *Ficus racemosa* found in southern  
16 India. *Ficophagus glomerata* n. sp. is characterised by small body having  $b=5.2-9.6$ ,  $c=18-23$ ;  
17 slightly set-off lip region having well developed cephalic framework; secretory-excretory pore  
18 opens near the head; slender stylet with small, rounded/ sloping knobs; ovoid median bulb with  
19 relatively posteriorly-placed valve plates; males with sickle-shaped spicules having spatulate or  
20 hammer-shaped capitulum, represented by an elongate-ovoid condylus and long digitate rostrum  
21 and tail conoid with fine, hair-like terminal spike. *Teratodiplogaster glomerata* n. sp. is  
22 characterised by long tubular and narrow stoma with fractal pieces in prostegostom; long  
23 rectangular metacarpus; female reproductive system with conspicuous spermatheca and  
24 amoeboid sperms; males having short, arcuate spicules and keeled gubernaculum; genital  
25 papillae in the configuration of P1, P2, C, P3, P4, P5d, (P6d, P7), P8d, Ph and tail conoid with a  
26 terminal or subterminal mucro. *Pristionchus glomerata* n. sp. is characterised by four  
27 morphotypes mainly with variations in lip region, stoma, spicules, gubernaculum, and the  
28 position of genital papillae. Phylogenetic analyses based upon near-full-length small subunit  
29 (SSU) and D2–D3 expansion segments of large subunit (LSU) rRNA genes confirmed affinities  
30 with sister species of corresponding genera.

31 **Keywords** – Fig nematodes, fig wasp, morphology, new species, morphometrics, molecular  
32 characterization

33

34  
35 Nematodes form the most abundant and diverse metazoans in the world and are associated with  
36 meso- and macro- faunal arthropods in various associations, ranging from parasitic to mutualistic  
37 (Giblin-Davis *et al.*, 2013). These associations have been proposed to lead to speciation and  
38 cause increase in nematode diversity and phenotypic plasticity by forming isolated systems  
39 (Price, 1980). One such example where such diversification has been observed is the fig–fig  
40 wasp–nematode system.

41 The fig–fig wasp system represents a ~75 million-year old obligate relationship (Cruaud *et al.*,  
42 2012) with over 800 known fig species, each associated with a specific pollinator wasp species,  
43 although host-switches and pollinator host sharing has been observed in neotropics (Weiblen,  
44 2002; Machado *et al.*, 2005). The enclosed fig inflorescence, called a syconium, forms a  
45 microcosm containing different species of wasps, bacteria, fungi, mites, and nematodes (Herre *et al.*,  
46 2008). The pollinator wasps are known to be associated with the nematode community  
47 comprising of individuals of a single or multiple taxa. The nematodes reported so far from  
48 syconia belong to the families, Rhabditidae, Diplogastridae and Aphelenchoididae (Giblin-Davis  
49 *et al.*, 2006; Gulcu *et al.*, 2008; Powers *et al.*, 2009; Susoy *et al.*, 2016; Kanzaki *et al.*, 2018)  
50 with associations ranging from phoresy to parasitism. Fig nematodes use fig wasps as their  
51 vectors in order to move from one fig (microcosm) to another (Krishnan *et al.*, 2010). The  
52 nematodes may be transported in the cavity, in intersegmental folds or may cling on to the body  
53 surface of the female fig wasp (Giblin-Davis *et al.*, 1995). *Parasitodiplogaster*,  
54 *Teratodiplogaster*, *Pristionchus*, *Acrostichus*, *Rhabditolaimus* (Diplogastridae);  
55 *Bursaphelenchus* (Aphelenchoididae); *Caenorhabditis* (Rhabditidae); *Schistonchus*  
56 (Aphelenchoididae); *Ficophagus* (Aphelenchoididae) and *Martininema* (Aphelenchoididae) are  
57 the genera known to be phoretic on pollinator fig wasps.

58 *Ficus racemosa*, the model system in this study, is a monoecious plant species whose syconia,  
59 harbour a community of nematodes. The nematode species reported from Indian *F. racemosa*  
60 include *Schistonchus racemosa* (Reddy & Rao, 1986), *S. osmani* (Anand, 2002), *S.*  
61 *cuculloracemosus* (Bajaj & Tomar, 2014), *S. flagelloracemosus* (Bajaj & Tomar, 2014), *S.*  
62 *mucroracemosus* (Bajaj & Tomar, 2014), *Teratodiplogaster racemosus* (Bajaj & Tomar, 2015)  
63 and *Canalodiplogaster racemosus* (Bajaj & Tomar, 2015); while the species reported from  
64 Australian *F. racemosa* include *Ficophagus altermacrophylla* (Kanzaki *et al.*, 2010) Davies &  
65 Bartholomaeus, 2015; *F. aculeata* (Kanzaki *et al.*, 2010) Davies & Bartholomaeus, 2015, *F.*  
66 *fleckeri* (Kanzaki *et al.*, 2010) Davies & Bartholomaeus, 2015 and *Teratodiplogaster fignewmani*  
67 (Kanzaki, 2009). The diplogastrid species *Pristionchus racemosa* (Susoy *et al.*, 2016) was  
68 described from syconia of *F. racemosa* from Vietnam.

69 The species reported from India lack critical morphological data for diagnosis and differentiation  
70 (Davies *et al.*, 2015). All of them also lack molecular characterization which makes future work  
71 with re-isolated lines difficult. Thus, there is a need to describe/re-describe the Indian species of  
72 nematodes associated with fig syconia with modern technologies. The present study deals with  
73 the morphological characterization of the nematode species isolated from *Ficus racemosa*  
74 located in southern India along with their molecular characterization to assess their phylogenetic  
75 status.

## 76 **Materials and Methods**

### 77 *Sample collection*

78 The fig syconia in *Ficus racemosa* pass through five developmental phases: phase A (pre-  
79 pollination stage, when syconia are at floral bud stage), phase B (pollen-receptive stage, marked  
80 by entry of pollinators through ostiole, a tiny opening in the syconium), phase C (development

81 phase of seeds, nematodes and wasps), phase D (wasp dispersal through the opening generated  
82 by the male pollinators) and phase E (fruit ripening stage) (Ranganathan *et al.*, 2010).  
83 Nematodes were collected from the mid-C phase syconia of *F. racemosa* trees in November  
84 2015 from the campus of the Indian Institute of Science, Bangalore, Karnataka, India at  
85 coordinates 13.0219° N, 77.5671° E.

#### 86 *Isolation and observation*

87 Syconia were washed and cut into small pieces using a scalpel. The latex produced by the middle  
88 layer of the syconium was absorbed using a tissue paper and the pieces of syconia were  
89 immersed in sterilized water for 15–20 min in a Petri dish. Nematodes were hand-picked under a  
90 stereoscopic microscope in sterilized water and later fixed in 4% formalin. The fixed nematodes  
91 were then dehydrated using glycerol-alcohol (a mixture of 95 parts of 30% ethanol + 5 parts  
92 glycerol) solution (Seinhorst *et al.*, 1959). Nematodes were mounted permanently on slides using  
93 wax ring technique (De Maeseneer & D' Herde, 1963) for observing under light microscope and  
94 conducting confocal imaging using Airyscan LSM 880, Zeiss. Drawings were made by tracing  
95 the confocal images while measurements were done using Image J 1.46r.

#### 96 *Scanning Electron Microscopy (SEM)*

97 SEM imaging was done to elucidate the surface features of the nematodes. The nematodes were  
98 first fixed in 2% glutaraldehyde for 24 h and then post-fixed in 2% osmium tetroxide for 2 h in  
99 the dark in a refrigerator. The nematodes were then washed with PBS and transferred into  
100 BEEM<sup>®</sup> capsules fitted with nylon mesh of 20 µm pore size to hold the specimens (Bozzola &  
101 Russell, 1999). The dehydration was carried out by using a serial gradation of alcohol up to  
102 100% and further the nematodes were critical point dried using CO<sub>2</sub>. Later, the nematodes were  
103 mounted on double-sided carbon tape placed on the stub, sputtered with 10 nm gold for 38 s and

104 viewed under SEM JEOL (JSM6510L) at 15 kV at the USIF, Aligarh Muslim University  
105 (Aligarh).  
106 *Molecular profiles and phylogeny*

107 Nematode DNA was isolated by picking up a single nematode in 5 µl of worm lysis buffer (50  
108 mM KCl, 10 mM Tris HCL pH 8.3, 2.5 mM MgCl<sub>2</sub>, 0.45% NP-40 and 0.45% Tween-20) as per  
109 the protocol of Williams *et al.* (1992) and keeping it in a water bath at 65°C for 45 min followed  
110 by 95°C for 15 min. The extracted DNA was stored at -20°C and used as template. Primers  
111 (Sigma Aldrich) used to amplify D2/D3LSU segment of all three species, were D2A  
112 (ACAAGTACCGTGGGGAAAGTTG) and D2B (TCGGAAGGAACCAGCTACTA) (Kanzaki  
113 *et al.*, 2009). Primers used to amplify SSU segments for *F. glomerata* n. sp. were SNF  
114 (TGGATAACTGTGGTAATTCTAGAGC) (Zeng *et al.*, 2007) and SNR  
115 (TTACGACTTTTGCCCGGTTTC); for *T. glomerata* n. sp. and *P. glomerata* n. sp., these primers  
116 were SSUF07 (AAAGATTAAGCCATGCATG) and SSU26R  
117 (CATTCTTGGCAAATGCTTCG) (Hermann *et al.*, 2006, 2007). The PCR products were  
118 sequenced, and the sequences were deposited in the GenBank database (Accession numbers in  
119 form of SSU/D2-D3 LSU for *F. glomerata* n. sp. MT903999/ MT903998, for *T. glomerata* n.  
120 sp. MT904001/ MT904002 and for *P. glomerata* n. sp. MT904000/ MT903997). The sequences  
121 were aligned by ClustalW and Muscle in MEGA 7 software and were further compared with  
122 those of other nematode species available at the GenBank database using the BLAST homology  
123 search program (Zhao *et al.*, 2015 for *Ficophagus* spp.; Kanzaki *et al.*, 2014 for  
124 *Teratodiplogaster* spp. and Susoy *et al.*, 2016 for *Pristionchus* spp). The best model used to  
125 generate the Bayesian trees was inferred by using Partition finder ver. 2.1.1. The Akaike-  
126 supported model, log likelihood (lnL), Akaike information criterion (AIC), the proportion of  
127 invariable sites, and the gamma distribution shape parameters and substitution rates were also

128 used in the phylogenetic analyses. The inferred model was further used to generate phylogenetic  
129 trees using Mr. Bayes software ver. 3.2.6 (Huelsenbeck & Ronquist, 2001) by running the chain  
130 for 1,000,000 generations and the ‘burnin’ was set at 1,000. We used the Markov Chain Monte  
131 Carlo (MCMC) method within a Bayesian framework to estimate the posterior probabilities of  
132 the phylogenetic trees (Larget & Simon, 1999) using 50% majority rule; the trees were  
133 visualized using Fig Tree ver. 1.4.3 (Rambaut, 2006).

## 134 **Results**

135 All new species described in this paper have been assigned the specific name “*glomerata*” since  
136 *Ficus glomerata* is a synonym of *Ficus racemosa*.

137 *Ficophagus glomerata* n. sp.

138 (Figs. 1-5)

139 MEASUREMENTS. Table 1, 2.

140 DESCRIPTION

141 *Male*

142 Body slender, small- to medium-sized, C-shaped when heat-killed, tapering at both ends with  
143 maximum width at 2/3<sup>rd</sup> of the body length from anterior end. Cuticle with annules < 1 µm wide  
144 at mid body. Lateral fields with single thick continuous ridge representing two lines. Lip region  
145 off-set; cephalic framework moderately sclerotized. Oral aperture surrounded by a sclerotized  
146 circular rim; labial disc absent; labial and cephalic sensilla papilliform, not discernible in LM but  
147 visible in SEM. Stylet 20–22 µm long, robust with small, rounded / sloping knobs; conus 60-  
148 65% of stylet length. Procorpus 35.0-51.7 µm long, median bulb round to ovoid, muscular,

149 separated from isthmus by a constriction; isthmus short, indistinguishable from elongated basal  
150 overlap represented by a long dorsal and small ventro-lateral lobe. Secretory-excretory pore  
151 located in anterior region, 13-16  $\mu\text{m}$  or *ca* 1.2-1.5 lip region diam. from anterior end. Pharyngo-  
152 intestinal junction posterior to median bulb in isthmus region. Deirids, hemizonid and phasmids  
153 not discernible. Testis usually on left side of intestine; seminal vesicle having amoeboid sperms.  
154 Spicules slender, strongly arcuate, with hammer-shaped capitulum with a depression comprising  
155 an ovoid, spatulate condylus and a long digitate rostrum. Gubernaculum absent. Three pairs of  
156 genital papillae in configuration of P1 subventral adcloacal pair and P2 subventral, halfway  
157 between cloaca and tail tip and P3 about 3-4  $\mu\text{m}$  anterior to tail terminus. Phasmids located  
158 laterally between P1 and P2. Tail conoid, strongly ventrally curved ending into a fine bristle-like  
159 spike. Bursa absent.

#### 160 *Female*

161 Body slender, ventrally curved or C-shaped when heat-killed, tapering at both ends with  
162 maximum diam. at mid-body. Lateral fields with a single ridge as observed under SEM  
163 occupying  $\sim 2 \mu\text{m}$  width; labial sensilla papilliform surrounding oral opening; four cephalic  
164 papillae present. Cephalic framework moderately sclerotized, Amphids not discernible under  
165 LM. Stylet moderately built with well-developed, rounded/ sloping knobs; conus approximately  
166 60-65% of stylet length. Procorpus slender (46.4  $\mu\text{m}$ - 55.6  $\mu\text{m}$ ) long; median bulb well-  
167 developed, ovoid in shape, with valve plates slightly posterior to middle. Pharyngeal glands and  
168 pharyngo-intestinal junction similar to those observed in male. Deirids and hemizonid not seen.  
169 Excretory pore located in anterior region, *ca* 1.2-1.5 lip region diam. from anterior end.  
170 Reproductive system monodelphic-prodelphic. Ovary large, outstretched or with flexure;  
171 reflexed part containing oocytes usually in single tier in the proximal region. Oviduct narrow,



172 spermatheca not differentiated; uterus slightly spacious chamber; post-uterine sac 0.4-0.8 times  
173 vulval body diam.; Vulva post-equatorial; vulval lips protruding in some specimens. Anus a  
174 crescent-shaped slit. Tail ventrally arcuate, four-times anal body diam. long with an obtuse or  
175 mucronate tip.

#### 176 TYPE HABITAT AND LOCALITY

177 *Ficophagus glomerata* n. sp. was collected from syconia of *Ficus racemosa* in and around the  
178 campus of Indian Institute of Science, Bangalore, Karnataka, India at coordinates 13.0219° N,  
179 77.5671° E.

#### 180 TYPE SPECIMENS

181 One holotype male (*F. glomerata* n. sp./1), eight paratype males (*F. glomerata* n. sp./2-8) and  
182 nine paratype females (*F. glomerata* n. sp./1-9) of *F. glomerata* n. sp. on slides were deposited in  
183 Indian Institute of Science, Bangalore, Karnataka, India. One female paratype (*F. glomerata* n.  
184 sp./10) and one male paratype (*F. glomerata* n. sp./9) were deposited in the National Nematode  
185 Collection, Indian Agricultural Research Institute, New Delhi.

186 **Etymology:** The species name “*glomerata*” derived from *Ficus glomerata*, is a synonym of  
187 *Ficus racemosa*.

#### 188 DIAGNOSIS AND RELATIONSHIP

189 The new species *F. glomerata* n. sp. can be characterised by small body having ‘b’=5.2-9.6, ‘c’=  
190 18-23; slightly setoff lip region having well developed cephalic framework; slender stylet with  
191 small, rounded/ sloping knobs; anteriorly located excretory pore; ovoid median bulb with  
192 relatively posteriorly-placed valve plates; males with sickle-shaped spicules having hammer-

193 shaped capitulum, represented by an ovoid spatula-shaped condylus and long digitate rostrum  
194 and tail conoid with fine, hair-like terminal spike and three pairs of genital papillae.

195 *Ficophagus glomerata* n. sp. closely resembles *F. fleckeri* (Davies *et al.*, 2013) Davies &  
196 Bartholomaeus, 2015 in most morphometric and morphological characteristics but differs in  
197 having less lines (2 vs 4) in lateral fields; greater ‘b’ value in male (6.7-7.8 vs 4.8-6.4); larger  
198 stylet (20-23  $\mu\text{m}$  vs 15-19  $\mu\text{m}$ ); spicules with an ovoid, spatula-shaped condylus, and rostrum  
199 digitate and separate (vs prominent condylus with rostrum merging into ventral arm); male tail  
200 with 3-4  $\mu\text{m}$  hair-like spike (vs 2-3  $\mu\text{m}$  long conical terminal mucro) and female tail with a  
201 narrow blunt mucro or terminus (vs acutely pointed terminus in *F. fleckeri*).

202 The new species closely resembles *F. microcarpus* Zeng *et al.*, 2011, in most morphometric and  
203 morphological characteristics but differs in relatively smaller ‘b’ (5.2-9.6 vs 8.5-13.0), ‘c’ (1.3-  
204 1.9 vs 2.6-3.6) and greater ‘c’ (18-23 vs 12.3-16.6) values in females; relatively posteriorly  
205 located excretory pore (13-16  $\mu\text{m}$  vs 3.5-5.5  $\mu\text{m}$ ) from anterior end; amphids indiscernible (vs  
206 prominent); post-uterine sac longer (more than vulval body diam. vs 0.4-0.8 vulval body diam.);  
207 males are relatively larger (604-886  $\mu\text{m}$  vs 400-486  $\mu\text{m}$ ) with sickle-shaped spicules having an  
208 ovoid, spatulate (vs small, rounded) condylus and long, digitate (vs narrowly rounded to short  
209 digitate) rostrum and cucullus absent (vs present at distal end of spicules in *F. microcarpus*).

210 *Ficophagus glomerata* n. sp. differs from *F. virens* Bartholomaeus *et al.*, 2009 in having lateral  
211 fields with 2 (vs 4) lateral lines; females with relatively smaller ‘a’ (20-28 vs 28-34) and ‘c’ (18-  
212 23 vs 19-41) values, longer stylet (20-23  $\mu\text{m}$  vs 14-16  $\mu\text{m}$ ); post-uterine sac longer (more than  
213 corresponding vulva body diam. vs 0.6-0.7 vulval body diam.); males having greater ‘b’ (6.7-7.8  
214 vs 3-5) value, sickle-shaped spicules having long, digitate (vs short, rounded to digitate) rostrum  
215 and tail with hair-like terminal spike (vs without terminal mucro in *F. virens*).

216 The new species differs from *F. altermacrophylla* Lloyd & Davies, 1997 in having lateral fields  
217 with 2 (vs 3) lateral lines; larger females (604-886  $\mu\text{m}$  vs 411-571  $\mu\text{m}$ ) with smaller ‘c’ (1.3-1.9  
218 vs 2.8-3.8), relatively posteriorly located (13-16  $\mu\text{m}$  vs 5-9  $\mu\text{m}$ ) excretory pore, longer stylet (20-  
219 23  $\mu\text{m}$  vs 14-18  $\mu\text{m}$ ); and relatively anteriorly located vulva (V= 61.2-76.7 vs 70-95); males  
220 having greater body diam. (19 -23  $\mu\text{m}$  vs 15-19  $\mu\text{m}$ ) and ‘b’ value (5.2-9.6 vs 3-5); posteriorly  
221 located (13-16  $\mu\text{m}$  vs 3-7  $\mu\text{m}$ ) excretory pore; post-uterine sac longer (more than corresponding  
222 vulval body diam. vs 0.4-0.8 vulval body diam.); and smaller (14-17  $\mu\text{m}$  vs 18-24  $\mu\text{m}$ ), sickle-  
223 shaped spicules with an ovoid, spatulate condylus and long, digitate rostrum (vs rose-thorn-  
224 shaped spicules with knob-like condylus and short, angular rostrum in *S. altermacrophylla*).  
225 *Ficophagus glomerata* n. sp. was compared with all the species of *Ficophagus* reported from  
226 India. The earlier reported species, *S. racemosa*, *S. osmani* isolated from *Ficus racemosa* were  
227 considered *species inquirendae* (Davies *et al.*, 2015) along with *S. hispida* (Kumari & Reddy,  
228 1984) isolated from *Ficus hispida*, due to insufficient information particularly on the position of  
229 the excretory pore, spicules and position of the caudal papillae. The present species, however,  
230 can be well differentiated from *S. racemosa*, *S. osmani* and *S. hispida* on account of  
231 morphometric values including shorter (vs larger) post-uterine sac in females; amoeboid (vs  
232 flagellate/ rod-shaped) sperms; smaller (vs longer) spicules and three pairs (vs two pairs) of  
233 genital papillae.  
234 Bajaj and Tomar (2014) published the description of eight species of *Schistonchus* isolated from  
235 three species of *Ficus*. Six of them appear to belong to genus *Ficophagus* largely on the position  
236 of excretory pore although the differentiating characters of the species are not clear. Only two  
237 species *S. flagellobenghalensis* (Bajaj & Tomar, 2014), *S. mucroracemosus* with a posterior  
238 excretory pore do not fit into *Ficophagus*. In absence of molecular characterization, the status of  
239 the species could not be confirmed due to considerable morphological fluidity and morphometric

240 overlap. Nevertheless, to verify the status and distinctness of *F. glomerata* n. sp., comparisons  
241 were made with species described from India.

242 The new species differs from *F. (= Schistonchus) mucrobenghalensis* (Bajaj & Tomar, 2014) n.  
243 comb. in having relatively smaller 'b' (6.7-7.8 vs 7.2-9.1) and 'c' (12-20 vs 21.9-26.7) values;  
244 dissimilar larger spicules; gubernaculum absent (vs faintly visible); genital papillae three pairs  
245 (vs four pairs) and tail with hair-like spike/mucro (vs tail devoid of mucro) in males and smaller  
246 'b' value (5.2-9.6 vs 7.0-9.2) in females and tail with short, blunt (vs long, pointed terminal)  
247 mucro in both sexes and genital papillae in males three pairs [vs four pairs in *F.*  
248 *mucrobenghalensis*]. A disparity in values of stylet length and excretory pore position was  
249 observed between description (page no. 199) and table (3).

250 The new species differs from *F. (= Schistonchus) antherobenghalensis* (Bajaj & Tomar, 2014) n.  
251 comb. in having longer stylet (20-22  $\mu\text{m}$  vs 15  $\mu\text{m}$ ); dissimilar spicules; and tail with hair-like  
252 spike (vs tail devoid of mucro) in male and tail in females having short, blunt (vs long, pointed  
253 terminal) mucro in *F. antherobenghalensis*. A disparity in position of excretory pore as stated in  
254 description (page no. 200) and that given in table (4) was found.

255 *Ficophagus glomerata* n. sp. differs from *F. (= Schistonchus) flagelloracemosus* in having  
256 smaller 'b' (6.7-7.8 vs 8.1-11.2), 'c' (12-20 vs 21.1-27.5) and greater 'c' (1.5-2.7 vs 1.2-1.4)  
257 values in males and smaller 'c' value (1.3-1.9 vs 3.4-5.2) in females; longer stylet (20-22  $\mu\text{m}$  vs  
258 14  $\mu\text{m}$ ); males with larger (14-17  $\mu\text{m}$  vs 9 -11  $\mu\text{m}$ ) spicules and gubernaculum absent [vs faintly  
259 visible in *F. flagelloracemosus* n. comb.]

260 The new species differs from *F. (= Schistonchus) cuculloracemosus* n. comb. in having smaller  
261 'b' (5.2-9.6 vs 10.9-15.1) value in females; stoma with rounded (vs elongated) knobs; excretory

262 pore relatively posteriorly located (13-15  $\mu\text{m}$  vs 7-12  $\mu\text{m}$ ) in males; spicules smaller (14-17  $\mu\text{m}$   
263 vs 20-22  $\mu\text{m}$ ), without (vs with cucullus) at distal end in *F. cuculloracemosus* n. comb.

264 The morphometric differences with the closely related species of *Ficophagus* reported from  
265 *Ficus racemosa* have been given in the Table 2.

#### 266 *Molecular phylogenetic relationship*

267 Partial SSU and D2-D3 of LSU genes were sequenced for *F. glomerata* n. sp. The relative  
268 placement of *F. glomerata* n. sp. among the other sequenced *Ficophagus* and *Schistonchus*  
269 species was analyzed. The Bayesian tree (Fig. 4) for SSU was constructed using *Ditylenchus*  
270 *halictus* (Zhao *et al.*, 2015) as an outgroup and suggested that: i) *F. glomerata* n. sp. forms a  
271 sister species with *S. microcarpus* having 97% posterior probability, ii) the genera  
272 *Aphelenchoides* Fischer, 1894, *Bursaphelenchus* Fuchs, 1937, *Laimaphelenchus* Fuchs, 1937 or  
273 *Schistonchus* are not monophyletic which stands in concordance with earlier studies (Zhao *et al.*,  
274 2015). The Bayesian tree inferred from D2-D3 of LSU genes (Fig. 5) using *Aphelenchoides*  
275 *besseyi* (Zhao *et al.*, 2015) as an outgroup, to analyze the relationships of the species in the genus  
276 *Schistonchus* suggested that: i) all the sequenced *Schistonchus* species are divided into two  
277 clades with 100% posterior probability support in accordance with earlier work done on the  
278 phylogeny of *Schistonchus* (= *Ficophagus*) species (Zeng *et al.*, 2011, Zhao *et al.*, 2015); ii) *F.*  
279 *glomerata* n. sp. appeared to be closest to an isolate of *Ficophagus* from *Ficus obliqua* in  
280 Australia, and forms a clade with 74% posterior probability support; this forms a sister group to  
281 two other clades, one formed by *F. virens* and another one which includes *F. zealandicus*, *F.*  
282 *altermacrophylla* and *F. benjamina* with 84% posterior probability support. Accession numbers  
283 in form of SSU/D2-D3 LSU for *Ficophagus glomerata* n. sp. are MT903999/ MT903998.

284

285

286

*Teratodiplogaster glomerata* n. sp.

287

(Figs. 3, 6-8)

288 MEASUREMENTS. Table 3

289 DESCRIPTION

290 *Adult*

291 Medium-sized species with thin, slender body, strongly curved in posterior region. Cuticle  
292 striated, 0.5-1.0  $\mu\text{m}$  in thickness. Lateral field with lines indiscernible. Lip region laterally  
293 flattened and expanded to form large scoop-like structure. Labial sensilla indiscernible whereas  
294 cephalic sensilla club-like. (Fig. 3.A). Stoma long and narrow *ca* 11-13 times longer than wide.  
295 Cheilostom cuticularised, long, funnel-shaped, anterior part slightly wider than posterior part.  
296 Gymnostom short, tubular, with thickened cuticularised walls, isotopic and isomorphic.  
297 Prostegostom shorter, with three fractal pieces in lateral view; mesostegostom represents  
298 considerably long part of stegostom; metastegostom slightly compressed chamber with thickened  
299 dorsal wall; metastegostomal armature comprising a short, thorn-like dorsal tooth, a medium-  
300 sized triangular right subventral tooth and thin left subventral ridge. Telostegostom sclerotised,  
301 narrow, tubular, connecting metastegostom to pharynx. Anterior part of pharynx muscular,  
302 longer than posterior part, consisting of a muscular cylindrical (procorpus) of 110-148  $\mu\text{m}$  length  
303 and well developed, elongated, 46-85  $\mu\text{m}$  long median bulb (metacarpus). Nerve ring  
304 surrounding posterior part of isthmus at 178-207  $\mu\text{m}$  from anterior end. Excretory pore located  
305 below nerve ring at 163 -207  $\mu\text{m}$  from anterior end.

306 *Male*

307 Body strongly arcuate in tail region. Testis single and outstretched; spermatocytes small,  
308 arranged irregularly in single or double rows at distal end. Spicule short, thick, slightly arcuate to  
309 strongly arcuate consisting of small and a reniform capitulum. Gubernaculum slender, bow-  
310 shaped to prominently keeled; weakly arcuate, tapering to blunt proximally, broad and keeled in  
311 the middle and finely attenuated at distal end. Eight pairs of genital papillae present with  
312 configuration of P1 (3.5-4 cloacal body diam. anterior to cloacal opening), P2 (1.5 cloacal body  
313 diam. anterior to cloacal opening) and P3 (just adjacent to cloacal lip), P4/P5 (located at one and  
314 a half cloacal body diam. posterior to spicules or about 1/3<sup>rd</sup> of distance from spicules to tail tip ,  
315 P6-7 form a group with a rudimentary bursal membrane around, P8d (located subdorsally near  
316 tail tip). Phasmids located after P8d. Tail broad and strongly arcuate ventrally. Tail tip rounded  
317 with a small mucro present terminally or subterminally.

318 *Female*

319 Reproductive system didelphic, amphidelphic; anterior ovary on the right and posterior on left of  
320 the intestine. Both genital branches equally developed. Each ovary reflexed at its total length,  
321 oocytes arranged in several rows in distal half and shift to a single file proximally. Oocytes show  
322 granular texture; oviducts slender with posterior part serving as spermatheca, containing  
323 amoeboid sperms; uterus with thick walls, occasionally containing one or two egg(s). Vagina  
324 perpendicular to body axis; four small vaginal glands present, observed in lateral view; vulval  
325 lips protruding, without vulval flap. Anus a dome-shaped slit, not protuberant. Tail broad, long,  
326 weakly tapering to a rounded terminus with a small blunt mucron.

327 TYPE HABITAT AND LOCALITY

328 *Teratodiplogaster glomerata* n. sp. was collected from *Ficus racemosa* host trees situated in and  
329 around the campus of Indian Institute of Science, Bangalore, Karnataka, India at coordinates  
330 13.0219° N, 77.5671° E.

#### 331 TYPE SPECIMENS

332 One holotype male (*T. glomerata* n. sp./1), eight paratype males (*T. glomerata* n. sp./2-8) and  
333 nine paratype females of *T. glomerata* n. sp. on slides were deposited in Indian Institute of  
334 Science, Bangalore, Karnataka, India. One female paratype (*T. glomerata* n. sp./10) and one  
335 male paratype (*T. glomerata* n. sp./9) were deposited in the National Nematode Collection,  
336 Indian Agricultural Research Institute, New Delhi.

337

338 Etymology: The species name “*glomerata*” derived from *Ficus glomerata*, is a synonym of *Ficus*  
339 *racemosa*.

#### 340 DIAGNOSIS AND RELATIONSHIP

341 *Teratodiplogaster glomerata* n. sp. is characterized by the presence of relatively narrow and  
342 elevated, laterally compressed lip region with fused lips, long tubular and narrow stoma with  
343 fractal pieces in prostegostom; long rectangular metacarpus; almost cylindroid to slightly  
344 expanded basal bulb; female reproductive system with conspicuous spermatheca and amoeboid  
345 sperms; males having short, arcuate spicules with tapering distal ends and curved and keeled  
346 gubernaculum; two pairs of precloacal genital papillae (P1, P2, C, P3, P4, P5d, (P6, P7), P8d,  
347 Ph) and tail conoid with a terminal or subterminal mucro. Comparison has been made with  
348 three species of *Teratodiplogaster* reported so far from *Ficus syconia* viz., *T. fignewmani*  
349 (Kanzaki *et al.*, 2009) isolated from *Ficus racemosa* (Australia), *T. martini* isolated from *Ficus*



350 *sycomorus* (Africa) (Kanzaki *et al.*, 2012) and *T. variegatae* isolated from *Ficus variegata*  
351 (Japan) (Kanzaki *et al.*, 2014).

352 *Teratodiplogaster glomerata* n. sp. differs from *T. fignewmani* in having smaller males (1195-  
353 1345  $\mu\text{m}$  vs 1850-2700  $\mu\text{m}$ ) and females (1388-1657  $\mu\text{m}$  vs 2160-3895  $\mu\text{m}$ ); females with  
354 smaller 'b' value (7.3-8.2 vs 9.5-13.5); stoma with (vs without) fractal dot-like arcade syncytia;  
355 amoeboid (vs lemon-shaped) spermatids; males having smaller 'c' (10.6-12.8 vs 16.9-26.6) and  
356 greater 'c' (6.2-8.5 vs 3.4-5.7) values; shorter (17-20 vs 25-32  $\mu\text{m}$ ), arcuate (vs stout, fusiform to  
357 bow-shaped) spicules; keeled (vs trough-shaped) gubernaculum and two pairs [vs three pairs of  
358 precloacal papillae in *T. fignewmani* *apud* Kanzaki *et al.*(2009)].

359 The new species differs from *T. martini* Kanzaki *et al.*, 2012 in having smaller males (1195-1345  
360 vs 1825-2650  $\mu\text{m}$ ) and females (1388-1657 vs 1750-3100  $\mu\text{m}$ ); females with smaller 'c' (8.3-  
361 13.0 vs 15.9-26.3) and greater 'c' (7.7-13.5 vs 4.8-7.3) values; relatively smaller metacarpus;  
362 males having smaller 'c' (10.6-12.8 vs 18.1-25.0) and greater 'c' (6.2 -8.5 vs 3.5-4.9) values;  
363 relatively shorter (17-20 vs 18-28  $\mu\text{m}$ ) spicules and keeled (vs L-shaped) gubernaculum and  
364 genital papillae having two precloacal pairs (vs three precloacal pairs) and with dissimilar  
365 configuration [P1, P2, C, P3, P4, P5d, (P6, P7) P8d, Ph vs P1, P2, P3, C, P4d, P5 (P6, P7), P8d,  
366 Ph in *T. martini* *apud* Kanzaki *et al.* (2012)].

367 The new species differs from *T. variegatae* Kanzaki *et al.*, 2014 in having larger females (1388-  
368 1657  $\mu\text{m}$  vs 805-1173  $\mu\text{m}$ ) having greater 'a' (68.8-79.7 vs 26.1-45.6), 'b' (7.3-8.2 vs 3.8-4.9)  
369 and 'c' (7.7-13.5 vs 3.2-3.8) values; smaller 'c' (8.3-13.0 vs 17.0-19.9); lip region elevated (vs  
370 flattened and low); metacarpus demarcated (vs indistinguishable); males having greater 'a'  
371 (62.0-69.6 vs 29.9-47.4), 'b' (5.9-6.3 vs 3.8-5.4) and 'c' (6.2 -8.5 vs 3.5-4.9) values; smaller 'c'  
372 (10.6-12.8 vs 18.1-25.0); relatively shorter (17-20  $\mu\text{m}$  vs 17-30  $\mu\text{m}$ ) spicules with simple, arcuate

373 vs keel-like dorsal part); genital papillae with dissimilar configuration (P1, P2, C, P3, P4, P5d,  
374 (P6, P7) P8d, Ph vs P1, P2, P3, C, (P4, P5d), (P6, P7), P8d, Ph and tail terminus with simple [vs  
375 star-shaped mucro in *T. variegatae apud* Kanzaki *et al.*(2014)].

376 The new species differs from *T. racemosus* Bajaj & Tomar (2015) in having smaller males  
377 (1195-1345  $\mu\text{m}$  vs 1412-2184  $\mu\text{m}$ ) having relatively smaller stoma (19-21  $\mu\text{m}$  vs 20-25  $\mu\text{m}$ );  
378 smaller (17-20 vs 19-25  $\mu\text{m}$ ) spicules; proximally attenuated (vs blunt) gubernaculum; genital  
379 papillae eight pairs (vs seven pairs) with dissimilar configuration (P1, P2, C, P3, P4, P5d, (P6,  
380 P7) P8d, Ph vs P1, P2, C, P3, P4, Ph, (P5, P6), P7d; relatively smaller females (1388-1657  $\mu\text{m}$  vs  
381 1587-2444  $\mu\text{m}$ ) with smaller 'c' value (10.6-12.8 vs 12.9-17.8); smaller (108-189  $\mu\text{m}$  vs 177-298  
382  $\mu\text{m}$ ) tail, and tail usually with subterminal (vs terminal mucro in *T. racemosus apud* Bajaj &  
383 Tomar, 2015).

384 The new species differs from *Ceratosolenus* (= *Rhabditolaimus*) *racemosa* (Anand, 2005) having  
385 presence of genital papillae (vs absence) and bow-shaped gubernaculum (vs rod-shaped). The  
386 species reported from India that include species belonging to both genus *Rhabditolaimus* and  
387 *Teratodiplogaster* have insufficient description, poor illustration and lack molecular  
388 characterization hence making it difficult to validate these as separate species. The morphometric  
389 differences within all the *Teratodiplogaster* species known so far, have been shown in Table 1.

390

### 391 *Molecular phylogenetic relationship*

392 Partial SSU and D2-D3 of LSU genes were sequenced for *T. glomerata* n. sp. The relative  
393 placement of *T. glomerata* n. sp. among the other sequenced *Teratodiplogaster* and  
394 *Paradiplogaster* species was analyzed. The Bayesian tree (Fig. 8) constructed using *Koerneria*

395 *luziae* (Kanzaki *et al.*, 2014) as an outgroup suggested that: i) *Parasitodiplogaster* forms a  
396 monophyletic clade in relation to the *Teratodiplogaster* clade, ii) In the *Teratodiplogaster* clade,  
397 the *Teratodiplogaster* species collected from *Ficus racemosa* shows a monophyletic relation  
398 with *T. variegatae*, and iii) *T. glomerata* n. sp. forms a sister species of *T. fignewmani* and also  
399 shows a monophyletic relationship. Accession numbers in form of SSU/D2-D3 LSU for *T.*  
400 *glomerata* n. sp. are MT904001/ MT904002.

401 ***Pristionchus glomerata* n. sp.**

402 (Figs. 9-15)

403 MEASUREMENTS. Table 4

404 DESCRIPTION

405 *Adult*

406 Body stout, length ranging from 1-1.5 mm. Cuticle thick, transversely annulated without  
407 punctations or longitudinal striations. Lateral field showing presence of a single ridge. Stomal  
408 morphology variable in five morphotypes of the species. Anterior part of pharynx (= pro- and  
409 metacarpus) 1.5 times as long as posterior part (isthmus and basal bulb). Procorpus muscular,  
410 stout,  $105.8 \pm 7.3 \mu\text{m}$  long; metacarpus very muscular representing rectangular or ovoid median  
411 bulb of  $43.8 \pm 5.6 \mu\text{m}$  dimension; isthmus narrow and not muscular; basal bulb small, glandular.  
412 Pharyngo-intestinal junction conspicuous. Nerve ring encircling middle or anterior to middle  
413 region of isthmus. Excretory pore faintly visible, with position ranging from anterior level of  
414 basal bulb to pharyngo-intestinal junction. Hemizonid and deirids obscure. Five different morphs  
415 could be observed out of which the pharynx of two morphotypes ( $\alpha$ ,  $\gamma$ ) possessed “fish-bone” or  
416 zipper-like lumen; pharyngeal lumen of morph  $\epsilon$  is smooth. Pharynx comprising an anterior

417 corpus continuing into a swollen metacarpus which is followed by a narrow isthmus terminating  
418 into an elongate expanded basal part.

419 *Male* (general morphology comprising  $\gamma$ ,  $\delta$ ,  $\epsilon$ )

420 Body straight to ventrally arcuate except strongly ventrally curved posterior region. Testis single,  
421 ventrally located at 1/3<sup>rd</sup> of genital branch from anterior end. Spermatocytes arranged in 2–5  
422 rows followed by amoeboid spermatids arranged in multiple rows in genital tract. Vas deferens  
423 not clearly separated from other parts of gonad. Spicules free, bow-shaped having a wide,  
424 bilobed capitulum and pointed distal end. Gubernaculum conspicuous, flared anteriorly with  
425 ventral and dorsal walls separated at an angle of 45° with a prominent, curved dorsal wall. Tail  
426 conical, tapering down abruptly, with long spike. Nine pairs of genital papillae arranged in  
427 configuration: P1, P2d, P3, C/P4, P5, Ph (P6, P7, P8), P9d. P1 located at 1.5 cloacal body diam.  
428 anterior to cloaca, P2 was located at 1 cloacal body diam. anterior to cloaca, P3 present above the  
429 cloaca, P4 just below the cloacal opening, P5 small 4–5  $\mu\text{m}$  anterior to P6 that form a group with  
430 P7 and P8, P9 posterior to P8 directed dorsally. Phasmid located between P5 and P6. Tail spike  
431 about 2.5–3.0 cloacal body diam. long.

432 *Female* (morph  $\alpha$ )

433 Body slightly arcuate when heat killed. Gonad didelphic, ovaries reversed. Anterior gonad right  
434 of intestine while posterior one on left side of intestine. Oocytes mostly arranged in multiple  
435 rows. Receptaculum seminis not observed; posterior part of oviduct serving as spermatheca  
436 holding small amoeboid sperm cells. Uterus spacious with 2–4 intra-uterine eggs. Vagina  
437 perpendicular to body surface; vulva elliptical slit-like with protruding lips. Posterior anal lip  
438 prolapsed. Tail long, conical to filiform. Tail spike about 2.5–3 cloacal body diam. long.

439

440 TYPE HABITAT AND LOCALITY

441 The type specimen was collected from *Ficus racemosa* host trees situated in and around the  
442 campus of Indian Institute of Science, Bangalore, Karnataka, India (GPS: (GPS: 13.0219° N,  
443 77.5671° E).

444 *Morphs*

445 Of the five morphotypes found,  $\alpha$  morphs are represented by females while  $\gamma$ ,  $\delta$ ,  $\epsilon$  are represented  
446 by males. The morphs mainly show phenoplastic traits in the anterior region especially the labial  
447 region, stoma and pharyngeal lumen. However, the general characters of females remain the  
448 same while males also show similar spicules and gubernaculum morphologies. Morphological  
449 illustrations and photographs are shown in Figs. 9 (A), 10-15.

450

451 Morph  $\alpha$  (Females): Lip region wide, slightly offset with six equal-sized, rounded lips;  
452 cheilostom equal or slightly longer than gymnostom, absence of tightly packed cheilostomal  
453 rugae, cheilostomal flap weak; gymnostom with prominent serrated anterior margin; pro-  
454 mesostegostom without lobes; metastegostom with claw-like dorsal tooth, curved right  
455 subventral tooth, and coarsely serrated left subventral ridge overlapping 2/3<sup>rd</sup> of the dorsal tooth;  
456 telostegostom long, sclerotized with straight dorsal and wide tapering subventral walls.  
457 Pharyngeal lumen zipper-like. Conspicuously larger phasmids present in anterior half of the tail,  
458 not found in any other morph.

459

460 Morph  $\gamma$  (Male): Lip region narrow; lips distinct; six equal-sized, amalgamated, stoma funnel-  
461 shaped, wider anteriorly and tapering at base; cheilostom thick; gymnostom relatively thin,  
462 smooth, narrower; metastegostom with a large flap-like dorsal tooth, a triangular right  
463 subventral tooth and left subventral ridge; stegostom simple, smooth, continuing into zipper-like  
464 (fish bone-like) pharyngeal lumen.

465

466 Morph  $\delta$  (Male): Lip region with six equal-sized, amalgamated lips; cheilostom thick with  
467 sloping walls, arched; gymnostom half the length of the cheliostom, thickened, arched;  
468 metastegostom with a triangular dorsal tooth and right subventral, dagger-like tooth and a left  
469 subventral plate; telostegostom shallow, short, weakly sclerotized.

470

471 Morph  $\epsilon$  (Male): Anterior labial region with umbrella-like flap having six labial projection; left  
472 side possessing a slit with a round opening at base, the flap in few specimens covers the  
473 gymnostom and cheilostom of one side and with six ribs consisting of labial papillae within the  
474 cuticle; cheilostom smooth, anterior margin marked by per- and interrarial notches; cheilostom  
475 and gymnostom equal in length and project outward, metastegostom simple, smooth, except for a  
476 flat, thin, claw-like dorsal tooth, ventral tooth absent; telostegostom weakly sclerotized,  
477 indistinct.

#### 478 TYPE HABITAT AND LOCALITY

479 *Pristionchus glomerata* n. sp. was collected from *Ficus racemosa* host trees situated in and  
480 around the campus of Indian Institute of Science, Bangalore, Karnataka, India at coordinates  
481 13.0219° N, 77.5671° E.

#### 482 TYPE SPECIMENS

483 One holotype male  $\epsilon$  morph (*P. glomerata* n. sp./1), eight paratype males (*P. glomerata* n. sp./2-  
484 8) and nine paratype females (*P. glomerata* n. sp./1-9) of *P. glomerata* n. sp. on slides were  
485 deposited in Indian Institute of Science, Bangalore, Karnataka, India. Holotype male ( $\epsilon$   
486 morphotype) (*P. glomerata* n. sp./9) was deposited in the National Nematode Collection, Indian  
487 Agricultural Research Institute, New Delhi.

488

489 Etymology: The species name “*glomerata*” derived from *Ficus glomerata*, is a synonym of *Ficus*  
490 *racemosa*.

#### 491 DIAGNOSIS AND RELATIONSHIP

492 *Pristionchus glomerata* n. sp. is characterized by its phoretic relationship with *Ceratosolen*  
493 *fusciceps*, the pollinator wasp of the *Ficus racemosa*, and presented four different morphotypes  
494 viz.,  $\alpha$ ,  $\gamma$ ,  $\delta$  and  $\epsilon$  types. The morphs mainly show variations in labial region ranging from  
495 rounded, truncate to umbrella-shaped, stoma from barrel-shaped to cuboidal or elongated, dorsal  
496 tooth being claw-shaped to triangular, dagger-like and pharyngeal lumen simple to zipper-like;  
497 female reproductive system didelphic, ovaries reversed; oocytes mostly arranged in multiple  
498 rows; proximally dilated oviduct holding amoeboid sperm cells; 2–4 intra-uterine eggs  
499 occasionally present; vulva elliptical slit-like with protruding lips; males having a bow-shaped  
500 spicules with a wide, bilobed capitulum; gubernaculum conspicuous, with 45° bent, curved  
501 dorsal wall. Tail conical, tapering down abruptly, with long spike. Nine pairs of genital papillae  
502 arranged in configuration P1, P2/ P2d, P3, C/P4, P5, Ph, (P6, P7, P8), P9d. The morphotype  $\alpha$   
503 possessed exceptionally large phasmids.

504 The new species is distinguished from all other Diplogastridae, except *P. borbonicus* Susoy *et*  
505 *al.*, 2016, *P. sycomori* Susoy *et al.*, 2016 and *P. racemosae* Susoy *et al.*, 2016 by the presence of

506 morphs of laterally symmetrical and laterally asymmetrical stomatal structures. The diagnostic  
507 characteristic features of this species are the gross morphological differences in the morphs  
508 compared with those of the species reported from fig species. Among the fig-associated  
509 *Pristionchus* species, *P. glomerata* n. sp. comes close to *P. racemosae* in having the basic  
510 structural similarity in the stomal components of four morphs; however, relatively cylindrical (vs  
511 globular) buccal cavity in  $\gamma$  and  $\delta$  morphotypes and relatively rectangular and less expanded  
512 (funnel-shaped and well expanded) lip region in  $\epsilon$  morphotype in *P. racemosae* and lacks  $\beta$   
513 morph.

514 *P. glomerata* n. sp. differs from *P. sycomori* in having lips moderately developed (vs large),  
515 equal-sized (vs lateral lips higher and wider than subventral and subdorsal lips); labial region  
516 with ring of conspicuous, thin cuticular cheilostomal filaments); cheilostom (equal or smaller vs  
517 twice the length of gymnostom) with less developed cheilostomal rugae (vs thick, tightly packed  
518 rugae); gymnostom without (vs with) heavy punctations, lip region slightly narrower (vs  
519 conspicuously wider) than the adjoining body; anterior labial margin smooth (vs projected,  
520 “wave”-like) in  $\alpha$  morphotype and larger, relatively expanded and umbrella-like (vs less  
521 expanded, barrel-shaped) lip region in  $\epsilon$  morphotype in *P. sycomori* *apud* Susoy *et al.* (2016)  
522 (Fig. 15).

523 *Pristionchus glomerata* n. sp. differs from *P. borbonicus* in having lips moderately developed (vs  
524 large), equal-sized (vs lateral lips higher and wider than subventral and subdorsal lips); labial  
525 region with ring of conspicuous, thin cuticular cheilostomal filaments); cheilostom (equal or  
526 smaller vs twice the length of gymnostom) with less developed cheilostomal rugae (vs thick,  
527 tightly packed rugae); gymnostom without (vs with) heavy punctations, lip region slightly  
528 narrower (vs conspicuously wider) than the adjoining body; anterior labial margin smooth (vs



529 projected, “wave”-like) in  $\alpha$  morphotype and larger, relatively expanded and umbrella-like (*vs*  
530 less expanded, barrel-shaped) lip region in  $\varepsilon$  morph in *P. sycomori apud* Susoy *et al.* (2016).  
531 *Pristionchus glomerata* n. sp. differs from *Canalodiplogaster racemosus* (Bajaj & Tomar 2015)  
532 in having 9 pairs of genital papillae (*vs* 7 pairs), conspicuous gubernaculum (*vs* large pouch  
533 shaped) and spicule monomorphic (*vs* dimorphic).

#### 534 REMARKS

535 Bajaj and Tomar (2015) reported a new genus *Canalodiplogaster* with *C. racemosus* as its  
536 species from the fig *F. racemosa* along with three other new genera. The description and  
537 illustrations of the former indicated it to be a species of *Pristionchus* with three morphotypes.  
538 The authors have identified the morphs as stenostomous and eurystomous individuals. The  
539 present species *P. glomerata* n. sp. with five morphs can be distinctly differentiated from the  
540 species (= *C. racemosus*) in having  $\gamma$  morph with funnel-shaped (*vs* barrel-shaped) buccal cavity;  
541 smaller (20-22  $\mu\text{m}$  *vs* 29-43  $\mu\text{m}$ ) spicules and morphotype  $\varepsilon$  with umbrella-like lip region  
542 represented by only males (*vs* females in the species (= *C. racemosus*) *apud* Bajaj and Tomar  
543 (2015)). The status of the latter species can be verified by revisiting the species for the molecular  
544 data and for detailed information about all the morphotypes associated with the species.

545

#### 546 *Molecular phylogenetic relationship*

547 Partial SSU and D2-D3 of LSU genes were sequenced for *P. glomerata* n. sp. The relative  
548 placement of *P. glomerata* n. sp. among the other known sequenced *Pristionchus* species was  
549 analyzed. The Bayesian tree (Fig. 16) constructed using *Koerneria* sp. (Kanzaki *et al.*, 2014),  
550 *Parapristionchus giblindavisi* and *Micoletzkyia masseyi* (Susoy *et al.*, 2016) as an outgroup,  
551 suggested that: i) The fig-associated *Pristionchus* form a polyphyletic clade in relation to *P.*

552 *bucculentus*, *P. elegans* and *P. fissidentatus*, ii) In the fig-associated *Pristionchus* clade,  
553 *Pristionchus* collected from *Ficus racemosa* shows a monophyletic relation to other fig-  
554 associated *Pristionchus* species, and iii) *P. glomerata* n. sp. is a sister species of *P. racemosae*  
555 and also shows a monophyletic relationship. Accession numbers in form of SSU/D2-D3 LSU for  
556 *Pristionchus glomerata* n. sp. are MT904000/ MT903997.

557

## 558 **Discussion**

559 Nematodes have long been associated with the fig syconium as a substratum for their growth and  
560 reproduction whereas the pollinators associated with figs are used as vehicles for their transport  
561 from one syconium to the other (Krishnan *et al.*, 2010). These nematodes in association with the  
562 fig syconium have shown millions of years of co-evolution, co-speciation and co-diversification  
563 (Herre, 1993; Davies *et al.*, 2015). Such associations might range from being commensal to  
564 parasitic in nature (Giblin-Davis *et al.*, 2013). The fig-associated nematodes of families  
565 Aphelenchoididae and Diplogastridae have shown independent phylogenetic radiation (Kanzaki  
566 *et al.*, 2009; Davies *et al.*, 2015). The former family constitutes plant-parasitic nematodes that  
567 feed on the anthers and the epidermis of the female florets of the fig (DeCrappeo & Giblin-  
568 Davis, 2001; Vovlas *et al.*, 1992; 1996; 1998; Giblin-Davis *et al.*, 1995, 2006; Center *et al.*,  
569 1999) whereas the latter family includes nematodes which can be fungal feeders, bacteriovores  
570 or insect parasites (Susoy *et al.*, 2016).

571 *Ficus racemosa*, the fig plant under study in this paper, is a monoecious species of subgenus  
572 *Sycomorus* commonly found in Bangalore, South India. A single pollinator wasp species  
573 *Ceratosolen fusciceps* and six non-pollinator fig wasp species (Ghara & Borges, 2010) have been  
574 found associated with this fig species, of which the former serves a reliable vehicle for nematode

575 transport (Krishnan *et al.*, 2010, Gupta & Borges, 2019). So far, the nematode species reported  
576 from *Ficus racemosa* belong to genera *Schistonchus*, *Ficophagus*, *Teratodiplogaster* and  
577 *Pristionchus* (= *Canalodiplogaster*) (Reddy & Rao, 1986; Anand, 2002; Anand, 2005; Bajaj &  
578 Tomar, 2014, 2015). However, in the present study we could find only three species associated  
579 with *Ficus racemosa*, each a representative of *Ficophagus*, *Teratodiplogaster* and *Pristionchus*.  
580 Coincidentally, all the species described from India lack molecular characterization and are  
581 differentiated mainly on minor morphological characters without any report of phenotypic  
582 plasticity thus causing difficulty in ascertaining their correct status in comparison with other  
583 species (Anand, 2002; Anand, 2005; Reddy & Rao, 1986; Davies *et al.*, 2013; 2015).  
584 *Ficophagus glomerata* n. sp. forms a sister species with *F. microcarpus* isolated from *Ficus*  
585 *microcarpa* in China under the phylogenetic analysis done using partial SSU region and  
586 *Ficophagus* sp. isolated from *Ficus obliqua* using the D2–D3 segment of LSU. It was found to  
587 be distantly related to the species found in Australia suggesting that the species might have  
588 diverged out separately either because of geographical range variation or due to host shift. The  
589 phylogenetic trees stand in concordance with the earlier study where it was proposed that the  
590 genera *Schistonchus* and *Ficophagus* represented two evolutionary lines of the polyphyletic  
591 clade (Davies *et al.*, 2010).  
592 The diplogastrid species, *T. glomerata* n. sp. shows affinities with *T. fignewmani* and *T.*  
593 *racemosus*. The presence of *T. glomerata* n. sp. in *Ficus racemosa* syconia suggests that a  
594 speciation event might have occurred due to large geographical ranges and genetic isolation of *F.*  
595 *racemosa* in south India compared to the south-east Asian populations (Bain *et al.*, 2016). The  
596 phylogenetic analysis done using SSU and LSU shows that *Teratodiplogaster* forms a  
597 monophyletic clade with respect to the *Pristionchus* clade. The new species *T. glomerata* n. sp.  
598 forms a sister species to *T. fignewmani*. The data still stands in concordance with the earlier

599 study suggesting the *Parasitodiplogaster* Poinar, 1979, and *Teratodiplogaster* Kanzaki *et al.*  
600 2009 clades to be monophyletic and separated into five groups, i.e. *Parasitodiplogaster australis*  
601 Bartholomaeus, *et al.* 2009, *Parasitodiplogaster sycophilon* Poinar 1979, *Parasitodiplogaster*  
602 *maxinema* Poinar & Herre, 1991, *Parasitodiplogaster laevigata* Giblin-Davis *et al.* 2006 and  
603 *Parasitodiplogaster citrinema* Poinar & Herre, 1991, and the *Teratodiplogaster* Kanzaki *et al.*  
604 2009 clade (Wöhr *et al.*, 2014).

605 *Pristionchus*, another genus of Diplogastridae, is known to be mainly associated with beetles but  
606 recently has been reported from *Ficus* species (Herrmann *et al.*, 2006, 2007; Kanzaki *et al.*,  
607 2011, 2012a, 2012b). The species found so far are *P. borbonicus* collected at Grand Étang, La  
608 Réunion Island, from *F. mauritiana*; *P. sycomori* collected in South Africa from *F. sycomorus*;  
609 *P. racemosae* collected in Vietnam from *F. racemosa* (Susoy *et al.*, 2016) and a species of  
610 *Pristionchus* reported (Bajaj & Tomar, 2015) from India with the name *Canalodiplogaster*  
611 *racemosus*. According to the phylogenetic analysis, *Pristionchus glomerata* n. sp. forms a  
612 closely related sister species to *P. racemosae* where the branch length increase in the arm of  
613 *Pristionchus glomerata* n. sp. depicts speciation with recent divergence. The species present in  
614 *Ficus racemosa* forms a monophyletic clade to the other *Pristionchus* species which are  
615 associated with figs. The close association is suggestive of speciation which might have occurred  
616 due to large geographical range variations. The occurrence of five morphotypes is an ideal case  
617 of character displacement for the efficient sharing of resources in the microhabitat of syconium  
618 populated by a good number of species. The morphs ( $\delta$ ,  $\epsilon$ ) with simple, tube-like buccal cavities  
619 devoid of effective armature seem to compete for a temporary bacterial food source whereas the  
620 predatory morphs ( $\alpha$ ,  $\gamma$ ) emerge next coinciding with the proliferation of wasp-transmitted  
621 nematodes in the syconium. Development of greater number of morphs might be due to the high  
622 climatic and seasonal variation which is observed in southern India (Gadgil & Joshi, 1983;

623 Gunnel 1997; Peel *et al.*, 2007; Shenoy & Borges, 2010; Chanam *et al.*, 2014). We observed sex  
624 specific stomatal morphs ( $\beta$  = adult female only) versus ( $\gamma, \delta, \epsilon$  = adult males only) which  
625 requires further validation through a study similar to that reported in Susoy *et al.* (2016) with  
626 *Pristionchus sycomori* where different early and late interfloral (phase C) figs were examined  
627 and large numbers of *Pristionchus* were sexed and assessed for stomatal morphotype. This will  
628 be attempted in the future.

629 The phylogenetic analyses of these nematodes using LSU and SSU of rRNA sequences have  
630 helped in the better understanding of nematode diversification. There are instances in which a  
631 single *Ficus* species is known to be associated with several nematode species belonging to the  
632 same genus, for example, several species of *Schistonchus* associated with *Ficus racemosa* in  
633 Australia (Davies *et al.*, 2010), which is suggestive of opportunities for host switching for such  
634 cosmopolitan fig species (Zhang *et al.*, 2006). Future studies on nematode taxonomy related to  
635 *Ficus* species should involve sequencing of at least two genes which might help to better resolve  
636 the phylogenetic trees of these nematode species. Special emphasis should be given to  
637 comparative genomic analyses using the new species and its close relatives which would yield  
638 interesting information concerning the genes involved in different life history traits, switching  
639 feeding habitats and the development of plant and animal parasitism. Further investigation on  
640 *Pristionchus* species associated with *Ficus* species might help us to conduct polymorphism  
641 studies across the several geographical landscapes to understand the relationships between form  
642 and function and how evolution may have proceeded from a common ancestor. This might even  
643 lead to better understanding of life history adaptations used by these nematode species. This  
644 study also paves the way for further research on fig nematodes related to their biodiversity,  
645 distribution, evolutionary history, host/carrier relationships with pollinators associated with the  
646 *Ficus* systems and co-speciation between fig and fig associated nematodes.

647 **Acknowledgements** This research was supported by funds from the Department of  
648 Biotechnology-Indian Institute of Science (IISc) Partnership Programme, and the Ministry of  
649 Environment, Forests & Climate Change. We are grateful to G Yettiraj and Sunitha Murray for  
650 logistical support. We are grateful to the University Sophisticated Instruments Facility (USIF) at  
651 Aligarh Muslim University for providing the electron microscope images. We thank the Bio-  
652 Imaging Facility at the Biological Sciences Division, IISc, for confocal images. We are grateful  
653 to two anonymous reviewers for their critical comments.

## 654 **References**

655 Anand, R. L. (2002). Studies on the association of a new nematode species *Schistonchus*  
656 *osmani* sp.n. (Aphlenchoidea Nickle, 1971), a wasp and fig *Ficus racemosa*. *Uttar*  
657 *Pradesh Journal of Zoology* 22, 281–283.

658 Anand, R. L. (2005). Association of a nematode *Ceratosolenus racemosa* gen.n.sp.n  
659 (Cylindrocorporidae: Rhabditida Goodey, 1939), a wasp (Ceratosolen sp.n.) and fig  
660 *Ficus racemosa*. *Uttar Pradesh Journal of Zoology* 25, 59–62.

661 Bain, A., Borges, R.M., Chevallier, M.H., Vignes, H., Kobmoo, N., Peng, Y.Q., Cruaud, A.,  
662 Rasplus, J.Y., Kjellberg, F. & Hossaert-Mckey, M. (2016). Geographic structuring into  
663 vicariant species-pairs in a wide-ranging, high-dispersal plant–insect mutualism: the case  
664 of *Ficus racemosa* and its pollinating wasps. *Evolutionary Ecology* 30, 663–684. DOI:  
665 10.1007/s10682-016-9836-5.

666 Bajaj, H.K. & Tomar, V.V.S. (2014). Descriptions of New and Known Species of  
667 *Schistonchus* Cobb, 1927 (Aphelenchida: Aphelenchoididae) from syconia of *Ficus* trees  
668 growing at Hisar, Haryana. *Indian Journal of Nematology* 44, 193–211.

- 669 Bajaj, H.K. & Tomar, V.V.S. (2015). Description of Diplogasterid nematodes (Nematoda:  
670 Diplogasterida) inhabiting syconia of *Ficus* species in Haryana, India. *Indian Journal of*  
671 *Nematology* 45, 23–38.
- 672 Bozzola, J. J. & Russell, L. D. (1999). *Electron microscopy: principles and techniques for*  
673 *biologists*. Jones & Bartlett Learning.
- 674 Center, B.J., Giblin-Davis, R.M., Herre, E.A. & Chung-Schickler, G.C. (1999). Histological  
675 comparisons of parasitism by *Schistonchus* spp. (Nemata: Aphelenchoididae) in  
676 neotropical *Ficus* species. *Journal of Nematology* 31, 393–406.
- 677 Chanam, J., Kasinathan, S., Pramanik, G.K., Jagdeesh, A., Joshi, K.A. & Borges, R.M.  
678 (2014). Context dependency of rewards and services in an Indian ant–plant  
679 interaction: southern sites favours the mutualism between plant and ants. *Journal of*  
680 *Tropical Ecology* 30, 219–229. DOI: 10.1017/S026646741400011X.
- 681 Cruaud, A., Rønsted, N., Chantarasuwan, B., Chou, L.S., Clement, W.L., Couloux, A.,  
682 Cousins, B., Genson, G., Harrison, R.D., Hanson, P.E. & Hossaert-Mckey, M. (2012).  
683 An extreme case of plant – Insect codiversification : Figs and Fig-Pollinating Wasps.  
684 *Systematic Biology* 61, 1029–1047. DOI: 10.1093/sysbio/sys068.
- 685 Davies, K.A., Bartholomaeus, F., Kanzaki, N., Ye, W. & Giblin-Davis, R.M. (2013). Three  
686 new species of *Schistonchus* (Aphelenchoididae) from the *Ficus* subgenus *Sycomorus*  
687 (Moraceae) in northern Australia. *Nematology* 15, 347–362. DOI: 0.1163/15685411-  
688 00002677.
- 689 Davies, K., Bartholomaeus, F., Ye, W., Kanzaki, N., & Giblin-Davis, R. (2010).  
690 *Schistonchus* (Aphelenchoididae) from *Ficus* (Moraceae) in Australia, with

- 691 description of *S. aculeata* n. sp. *Journal of Nematology* 12, 935–958. DOI:  
692 10.1163/138855410X498932.
- 693 Davies, K.A., Ye, W., Kanzaki, N., Bartholomaeus, F., Zeng, Y. & Giblin-Davis, R.M.  
694 (2015). A review of the taxonomy, phylogeny, distribution and coevolution of  
695 *Schistonchus* Cobb, 1997 with proposal of *Ficophagus* n. gen, and *Martininema* n.  
696 gen. Nematoda: Aphelenchoididae). *Nematology* 17, 761–829. DOI:  
697 0.1163/15685411-00002907.
- 698 De Maeseneer, J. & d’Herde, J. (1963). Méthodes utilisées pour l’étude des anguillules  
699 libres du sol. *Revue de Agriculture Bureaux*, 16, 441–447.
- 700 DeCrappeo, N. & Giblin-Davis, R.M. (2001). *Schistonchus aureus* n. sp. and *S. laevigatus* n.  
701 sp. (Aphelenchoididae): Associates of Native Floridian *Ficus* spp. and their  
702 *Pegoscopus* Pollinators (Agaonidae). *Journal of Nematology* 33, 91–103.
- 703 Gadgil, S. & Joshi, N. V. (1983). Climatic clusters of the Indian region. *Journal of*  
704 *Climatology* 3, 47–53. DOI: 10.1002/joc.3370030105.
- 705 Ghara, M. & Borges, R. M. (2010). Comparative life-history traits in a fig wasp community:  
706 implications for community structure. *Ecological Entomology* 35, 139–148. DOI:  
707 10.1111/j.1365-2311.2010.01176.x.
- 708 Giblin-Davis, R., Kanzaki, N. & Davies, K. (2013). Nematodes that ride insects: unforeseen  
709 consequences of arriving species. *Florida Entomological Society* 96, 770–780.  
710 DOI:10.1653/024.096.0310.



- 711 Giblin-Davis, R.M., Center, B.J., Nadel, H., Frank, J.H. & Ramirez, W. (1995). Nematodes  
712 associated with fig wasps, *Pegoscapus* spp. (Agaonidae), and syconia native floridian  
713 figs (*Ficus* spp.). *Journal of Nematology* 27, 1–14.
- 714 Giblin-Davis, R.M., Ye, W., Kanzaki, N., Williams, D., Morris, K. & Thomas, W.K. (2006).  
715 Stomatal ultrastructure, molecular phylogeny, and description of *Parasitodiplogaster*  
716 *laevigata* n. sp. (Nematoda: Diplogastridae), a parasite of fig wasps. *Journal of*  
717 *Nematology* 38, 137–149.
- 718 Gulcu, B., Hazir, S., Giblin-Davis, R., Ye, W., Kanzaki, N., Mergen, H., Keskin, N. &  
719 Thomas, W.K. (2008). Molecular variability of *Schistonchus caprifici* (Nematoda:  
720 Aphelenchoididae) from *Ficus carica* in Turkey. *Nematology* 10, 639–649. DOI:  
721 10.1163/156854108785787244.
- 722 Gunnel, Y. (1997). Relief and climate in South Asia: the influence of the Western Ghats on  
723 the current climate pattern of peninsular India. *International Journal of Climatology*  
724 17, 1169–1181. DOI:10.1002/(SICI)1097-0088(199709)17:11<1169::AID-  
725 JOC189>3.0.CO;2-W.
- 726 Gupta, S., & Borges, R. M. (2019). Density-dependent fitness effects stabilize parasitic  
727 hitchhiking within a mutualism. *Functional Ecology*, 33, 2304–2315.
- 728 Herre, E. A. (1993). Population structure and the evolution of virulence in nematode  
729 parasites of fig wasps. *Science* 259, 1442–1445. DOI:  
730 10.1126/science.259.5100.1442.
- 731 Herre, E. A., Allen, E., Jandér, K. C. & Machado, C. A. (2008). Evolutionary ecology of figs  
732 and their associates: recent progress and outstanding puzzles. *Annual Review of*

- 733           *Ecology, Evolution and Systematics* 39, 439–458. DOI:  
734           10.1146/annurev.ecolsys.37.091305.110232.
- 735           Herrmann, M., Mayer, W. E. & Sommer, R. J. (2006). Nematodes of the genus *Pristionchus*  
736           are closely associated with scarab beetles and the Colorado potato beetle in western  
737           Europe. *Zoology* 109, 96–108. DOI: 10.1016/j.zool.2006.03.001.
- 738           Herrmann, M., Mayer, W. E., Hong, R. L., Kienle, S., Minasaki, R. & Sommer, R. J. (2007).  
739           The nematode *Pristionchus pacificus* (Nematoda: Diplogastridae) is associated with  
740           the oriental beetle *Exomala orientalis* (Coleoptera: Scarabaeidae) in Japan.  
741           *Zoological Science* 24, 883–889. DOI: 10.2108/zsj.24.883.
- 742           Huelsenbeck, J. P. & Ronquist, F. (2001). MRBAYES: Bayesian inference of phylogenetic  
743           trees. *Bioinformatics* 17, 754–755.
- 744           Kanzaki, N., Bartholomaeus, F., Ye, W., Davies, K., & Giblin-Davis, R. (2009).  
745           *Schistonchus virens* sp. n. (Aphelenchoididae) and *Parasitodiplogaster australis* sp.  
746           n. (Diplogastridae) from *Ficus virens* (Moraceae) in Australia, *Nematology* 11, 583–  
747           601. DOI: 10.1163/138855409X12465362560638.
- 748           Kanzaki, N., Giblin-Davis, R.M., Davies, K., Ye, W., Center, B.J. & Thomas, W.K. (2009).  
749           *Teratodiplogaster fignewmani* gen. nov., sp. nov. (Nematoda: Diplogastridae) from  
750           the syconia of *Ficus racemose* in Australia. *Zoological Science* 26, 569–578. DOI:  
751           10.2108/zsj.26.569.
- 752           Kanzaki, N., Taki, H., Masuya, H., Okabe, K., Tanaka, R. & Abe, F. (2011). Diversity of  
753           stag beetle-associated nematodes in Japan. *Environmental Entomology* 40, 281–288.  
754           DOI: 10.1603/EN10182.

- 755 Kanzaki, N., Giblin- Davies, M., Davies, K. & Center, B. J. (2012). *Teratodiplogaster*  
756 *martini* n. sp. and *Parasitodiplogaster doliostoma* n. sp. (Nematoda: Diplogastridae)  
757 from the syconia of *Ficus* species from Africa. *Nematology* 14, 529–546. DOI:  
758 10.1163/156854111X612216.
- 759 Kanzaki, N., Herrmann, M., Sommer, R. J. & Ragsdale, E. J. (2012). Two new species of  
760 *Pristionchus* (Rhabditida: Diplogastridae): *P. fissidentatus* n. sp. from Nepal and La  
761 Re´union Island and *P. elegans* n. sp. from Japan. *Journal of Nematology* 44, 80–91.
- 762 Kanzaki, N., Taki, H., Masuya, H. & Okabe, K. (2012). *Bursaphelenchus tadamiensis* n. sp.  
763 (Nematoda: Aphelenchoididae), isolated from a stag beetle, *Dorcus striatipennis*  
764 (Coleoptera: Lucanidae), from Japan. *Journal of Nematology* 14, 223–233.
- 765 Kanzaki, N., Tanaka, R. & Woodruff, G. C. (2014). *Teratodiplogaster variegatae* n. sp.  
766 (Nematoda: Diplogastridae) isolated from the syconia of *Ficus variegata* Blume on  
767 Ishigaki Island, Okinawa, Japan. *Nematology* 16, 1153–1166. DOI:  
768 10.1163/15685411-00002843.
- 769 Kanzaki, N., Tanaka, R., Giblin-Davis, R. M. & Davies, K. A. (2014). New plant-parasitic  
770 nematode from the mostly mycophagous genus *Bursaphelenchus* discovered inside  
771 figs in Japan. *PLoS One* 9, p.e99241. DOI: 0.1371/journal.pone.0099241.
- 772 Kanzaki, N., Tsai, I.J., Tanaka, R., Hunt, V.L., Liu, D., Tsuyama, K., Maeda, Y., Namai, S.,  
773 Kumagai, R., Tracey, A. & Holroyd, N. (2018). Biology and genome of a newly  
774 discovered sibling species of *Caenorhabditis elegans*. *Nature communications*, 9, 1-  
775 12.

- 776 Krishnan, A., Muralidharan, S., Sharma, L. & Borges, R. M. (2010). A hitchhiker's guide to  
777 a crowded syconium: how do fig nematodes find the right ride? *Functional Ecology*  
778 24, 741–749. DOI: 10.1111/j.1365-2435.2010.01696.x.
- 779 Larget, B. & Simon, D. L. (1999). Markov chain Monte Carlo algorithms for the Bayesian  
780 analysis of phylogenetic trees. *Molecular Biology and Evolution* 16, 750–759.
- 781 Lloyd, J., & Davies, K. A. (1997). Two new species of *Schistonchus* (Tylenchida:  
782 Aphelenchoididae) associated with *Ficus macrophylla* from Australia. *Fundamental*  
783 *and Applied Nematology* 20, 79–86.
- 784 Machado, C. A., Robbins, N., Gilbert, M. T. P., & Herre, E. A. (2005). Critical review of  
785 host specificity and its coevolutionary implications in the fig/fig-wasp  
786 mutualism. *Proceedings of the National Academy of Sciences*, 102, 6558–6565.
- 787 Peel, M.C., Finlayson, B. L. & McMahon, T.A. (2007). Updated world map of the Köppen-  
788 Geiger climatic classification. *Hydrology and Earth System Sciences*. 11, 1633–1644.
- 789 Powers, T.O., Neher, D.A., Mullin, P., Esquivel, A., Giblin-Davis, R.M., Kanzaki, N., Stock,  
790 S.P., Mora, M.M. & Uribe-Lorio, L. (2009). Tropical nematode diversity: Vertical  
791 stratification of nematode communities in a Costa Rican humid lowland rainforest.  
792 *Molecular Ecology* 18, 985–996. DOI: 10.1111/j.1365-294X.2008.04075.x.
- 793 Price, P. W. (1980). *Evolutionary biology of parasites*. Princeton, NJ, USA, Princeton  
794 University Press.
- 795 Rambaut, A. (2006). Fig Tree. <http://tree.bio.ed.ac.uk/software/figtree/>.
- 796 Ranganathan, Y., Ghara, M. & Borges, R. M. (2010). Temporal associations in fig–wasp–ant  
797 interaction: diel and phenological patterns. *Entomologia Experimentalis et Applicata*  
798 137, 50–61. DOI: 10.1111/j.1570-7458.2010.01038.x.

- 799 Reddy, Y. N. & Rao, P. N. (1986). *Schistonchus racemosa* sp. n., a nematode parasite of  
800 wasp (*Ceratosolen* spp.) associated with the fig *Ficus racemosa* L. *Indian Journal of*  
801 *Nematology* 1, 135–137.
- 802 Seinhorst, J. W. (1959). A rapid method for the transfer of nematodes from fixative to  
803 anhydrous glycerin. *Nematologica* 4, 67–69. DOI: 10.1163/187529259X00381.
- 804 Shenoy, M. & Borges, R. M. (2010). Geographical variation in ant–plant interaction  
805 correlates with domatia occupancy, local ant diversity, and interloper. *Biological*  
806 *Journal of the Linnean Society* 100, 538–551. DOI: 10.1111/j.1095-  
807 8312.2010.01459.x.
- 808 Susoy, V., Herrmann, M., Kanzaki, N., Kruger, M., Nguyen, C.N., Rödelsperger, C., Röseler,  
809 W., Weiler, C., Giblin-Davis, R.M., Ragsdale, E.J. & Sommer, R.J. (2016). Large-  
810 scale diversification without genetic isolation in nematode symbionts of figs. *Science*  
811 *Advances* 2, e1501031. DOI: 10.1126/sciadv.1501031.
- 812 Vovlas, N. & Larizza, A. (1996). Relationship of *Schistonchus caprifici* (Aphelenchoididae)  
813 with fig inflorescences, the fig pollinator *Blastophaga psenes*, and its cleptoparasite  
814 *Philotrypesis caricae*. *Fundamental and Applied Nematology* 19, 443–448.
- 815 Vovlas, N. (1992). Taxonomy of *Discocriconemella* (Nematoda: Criconematoidea) with a  
816 redescription of *D. mauritiensis*. *Journal of Nematology* 24, 391–398.
- 817 Vovlas, N., Troccoli, A., Van Noort, S. & Van den Berg, E. (1998). *Schistonchus africanus*  
818 n. sp. (Aphelenchida: Aphelenchoididae) associated with *Ficus thonningii* (Moraceae)  
819 and its pollinator wasp *Elisabethiella stuckenbergi* (Chalcidoidea: Agaonidae).  
820 *Journal of Nematology* 30, 404–410.
- 821 Weiblen, G. D. (2002). How to be a fig wasp? *Annual Review of Entomology* 47, 299–330.  
822 DOI: 10.1146/annurev.ento.47.091201.145213.

- 823 Williams, B.D., Schrank, B., Huynh, C., Shownkeen, R. & Waterston, R.H. (1992). A  
824 genetic mapping system in *Caenorhabditis elegans* based on polymorphic sequence-  
825 tagged sites. *Genetics* 131, 609–624.
- 826 Wöhr, M., Greeff, J.M., Kanzaki, N., Ye, W. & Giblin-Davis, R.M. (2014). Molecular and  
827 morphological observations on *Parasitodiplogaster sycophilon* Poinar, 1979  
828 (Nematoda: Diplogastrina) associated with *Ficus burkei* in Africa. *Nematology*  
829 16,453–462. DOI: 10.1163/15685411-00002777.
- 830 Zeng, Y., Ye, W. & Giblin-Davis, R. (2007). Two new species of *Schistonchus* (Nematoda:  
831 Aphelenchoididae) associated with *Ficus hispida* in China. *Nematology* 9, 169–187.  
832 DOI: 10.1163/156854107780739135.
- 833 Zeng, Y., Zhang, S., Ye, W., Du, Z., Li, C., & Giblin-Davis, R. (2011). Description of  
834 *Schistonchus microcarpus* n. sp. (Nematoda: Aphelenchoididae), an associate of  
835 *Ficus microcarpa* in China. *Nematology*, 13, 221–233. DOI:  
836 10.1163/138855410X518452.
- 837 Zhang, G., Song, Q. & Yang, D. (2006). Phenology of *Ficus racemosa* in Xishuangbanna,  
838 Southwest China. *Biotropica* 38, 334–341. DOI: 10.1111/j.1744-7429.2006.00150.x.
- 839 Zhao, Z., Li, D., Davies, K.A. & Ye, W. (2015). *Schistonchus zealandicus* n. sp. (Nematoda:  
840 Aphelenchoididae) associated with *Ficus macrophylla* in New Zealand. *Nematology*  
841 17, 53–66. DOI: 10.1163/15685411-00002851.

## Figures

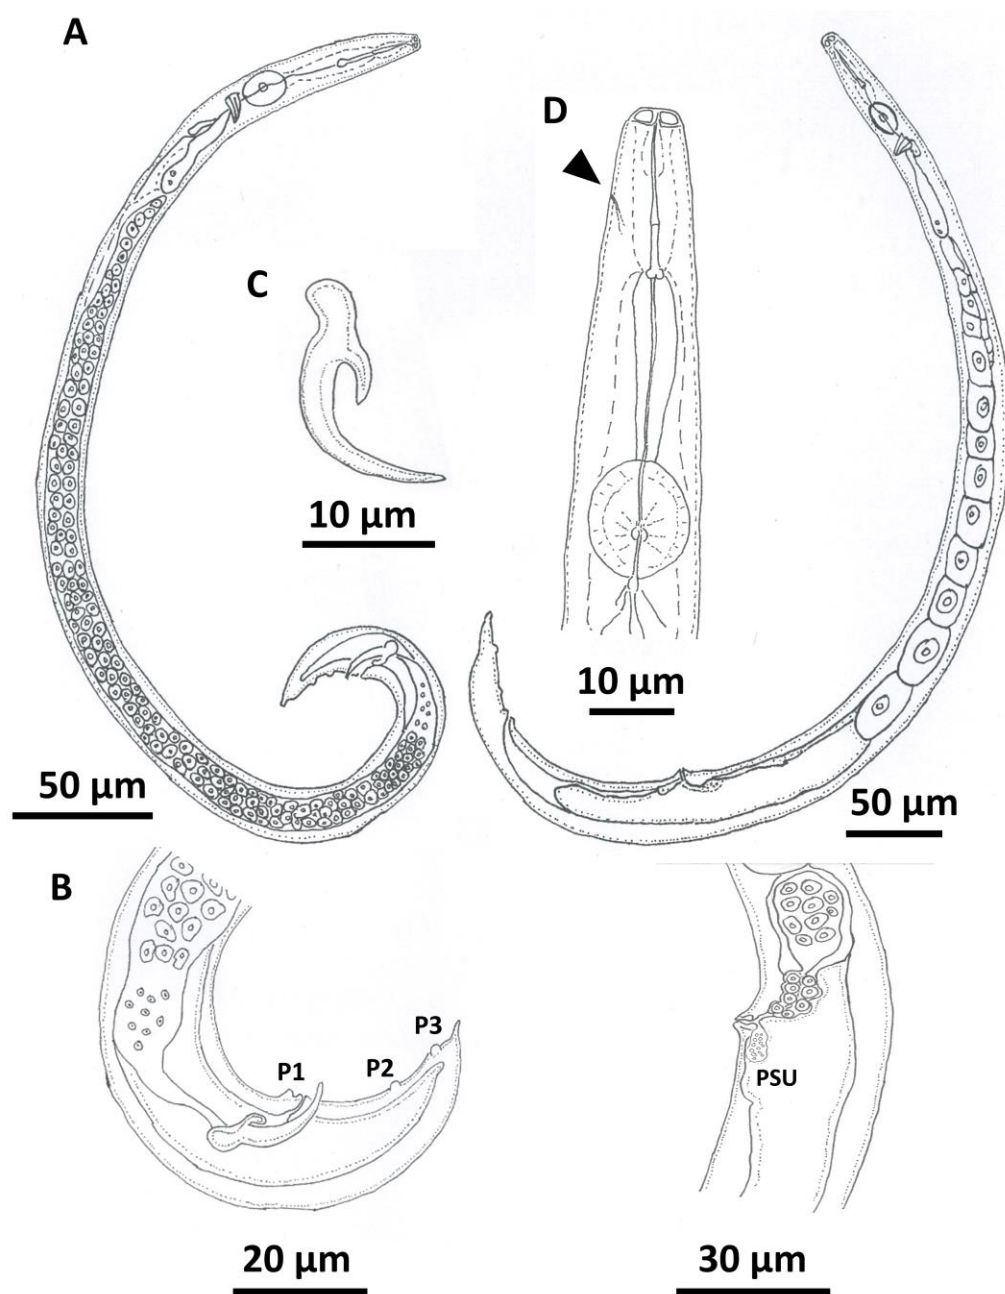

**Fig. 1.** *Ficophagus glomerata* n. sp. lateral view Male A: Habitus, B: Tail region, C: Spicule, D: Anterior region (similar in case of female); Female E: Habitus and F: Vulval region.



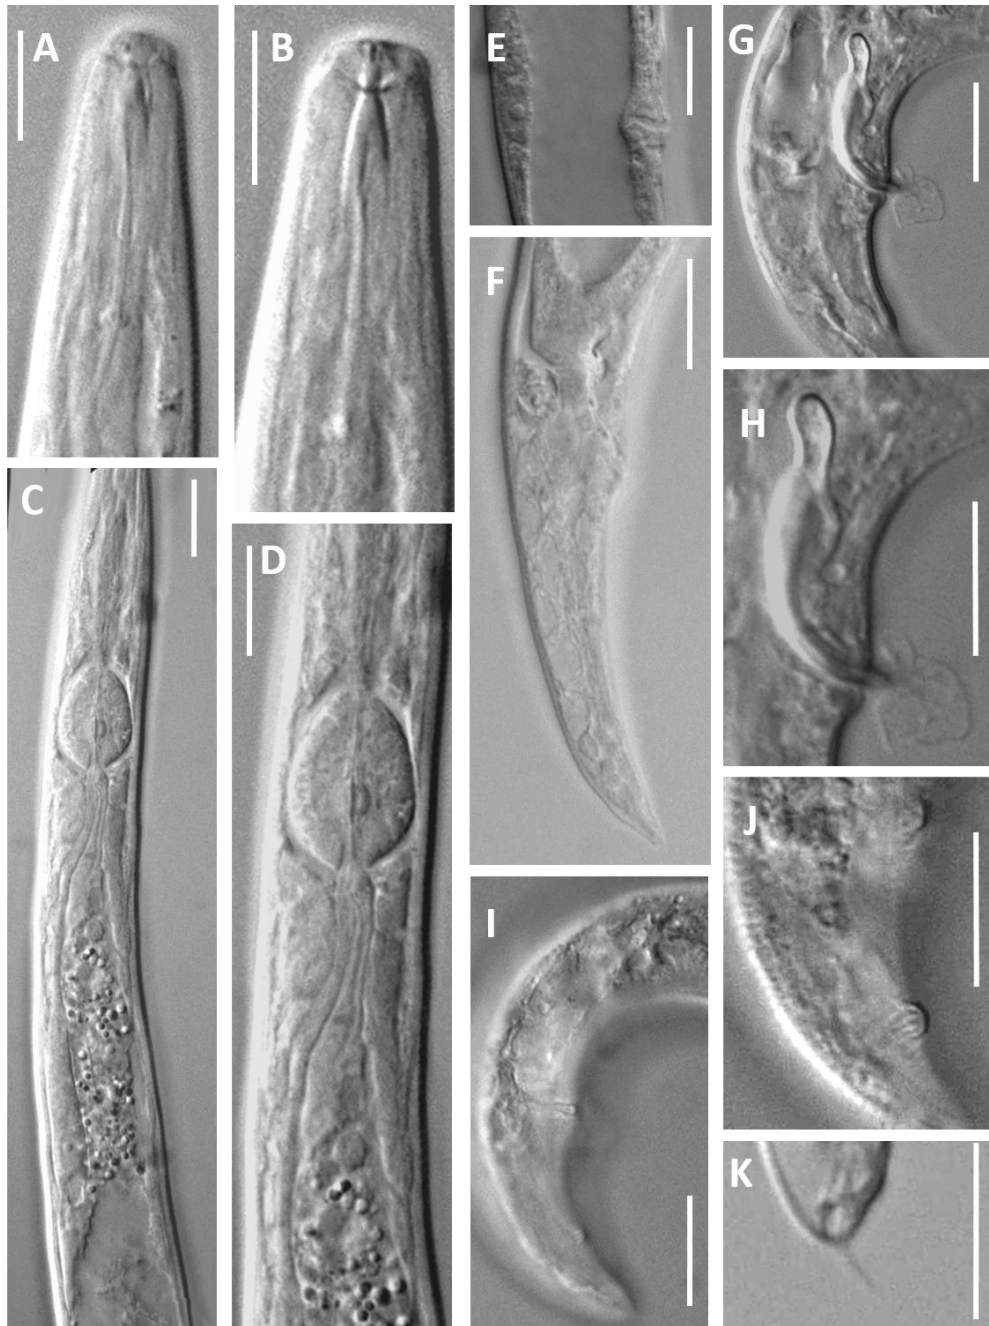

**Fig. 2.** Photomicrographs of *Ficophagus glomerata* n. sp., anterior end of a male showing a stylet and basal knob (A – B) and a distinct median bulb and pharyngeal glands (C – D). Vulval region of female showing vulval opening (E), and tail region of the male showing anal opening (F), spicule (G – H), genital papillae (I – J) and spicate tip (K). Scale bar: (A – K) 10  $\mu$ m.



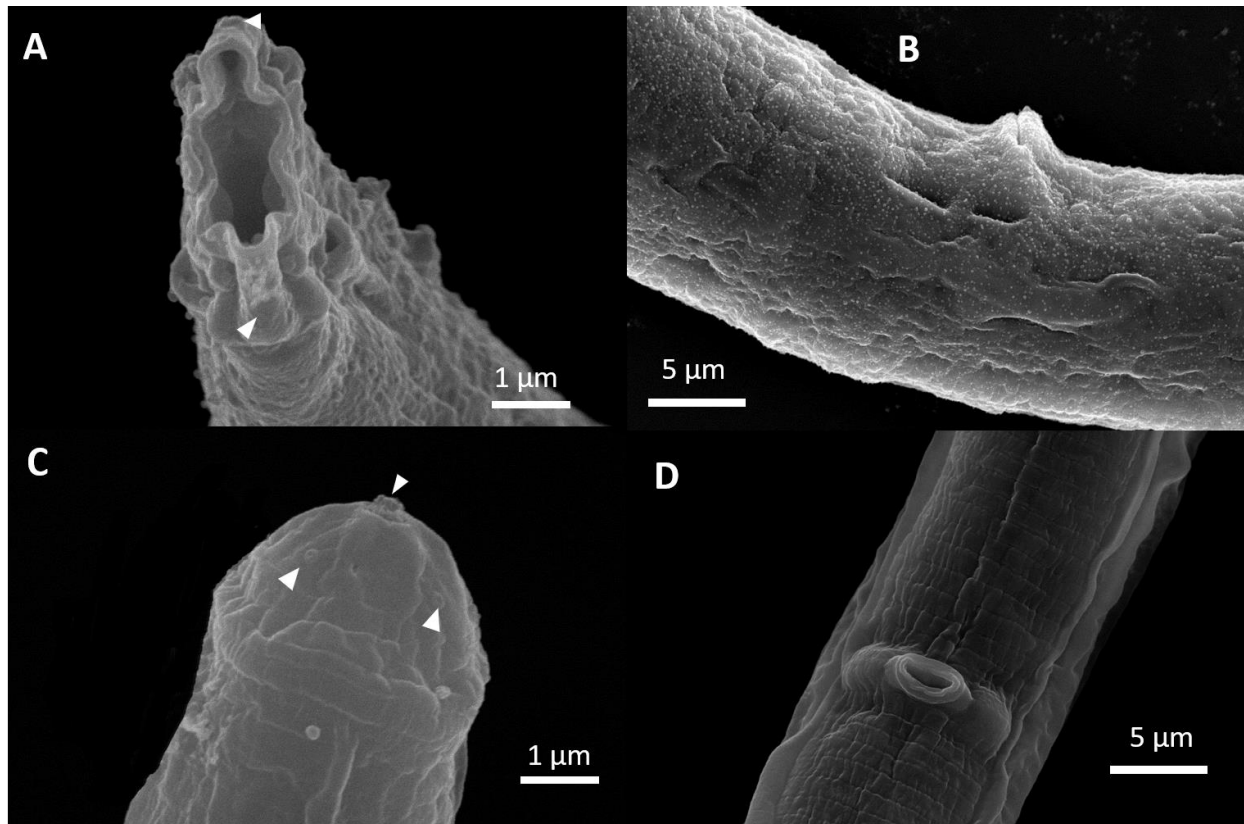

**Fig. 3.** SEM observations: A: Anterior end; B: Vulval region of female of *Teratodiplogaster glomerata* n. sp.; C: Anterior end; D: Vulval region of female *Ficophagus glomerata* n. sp. (arrows indicate points to the amphidal pore and cephalic sensilla).

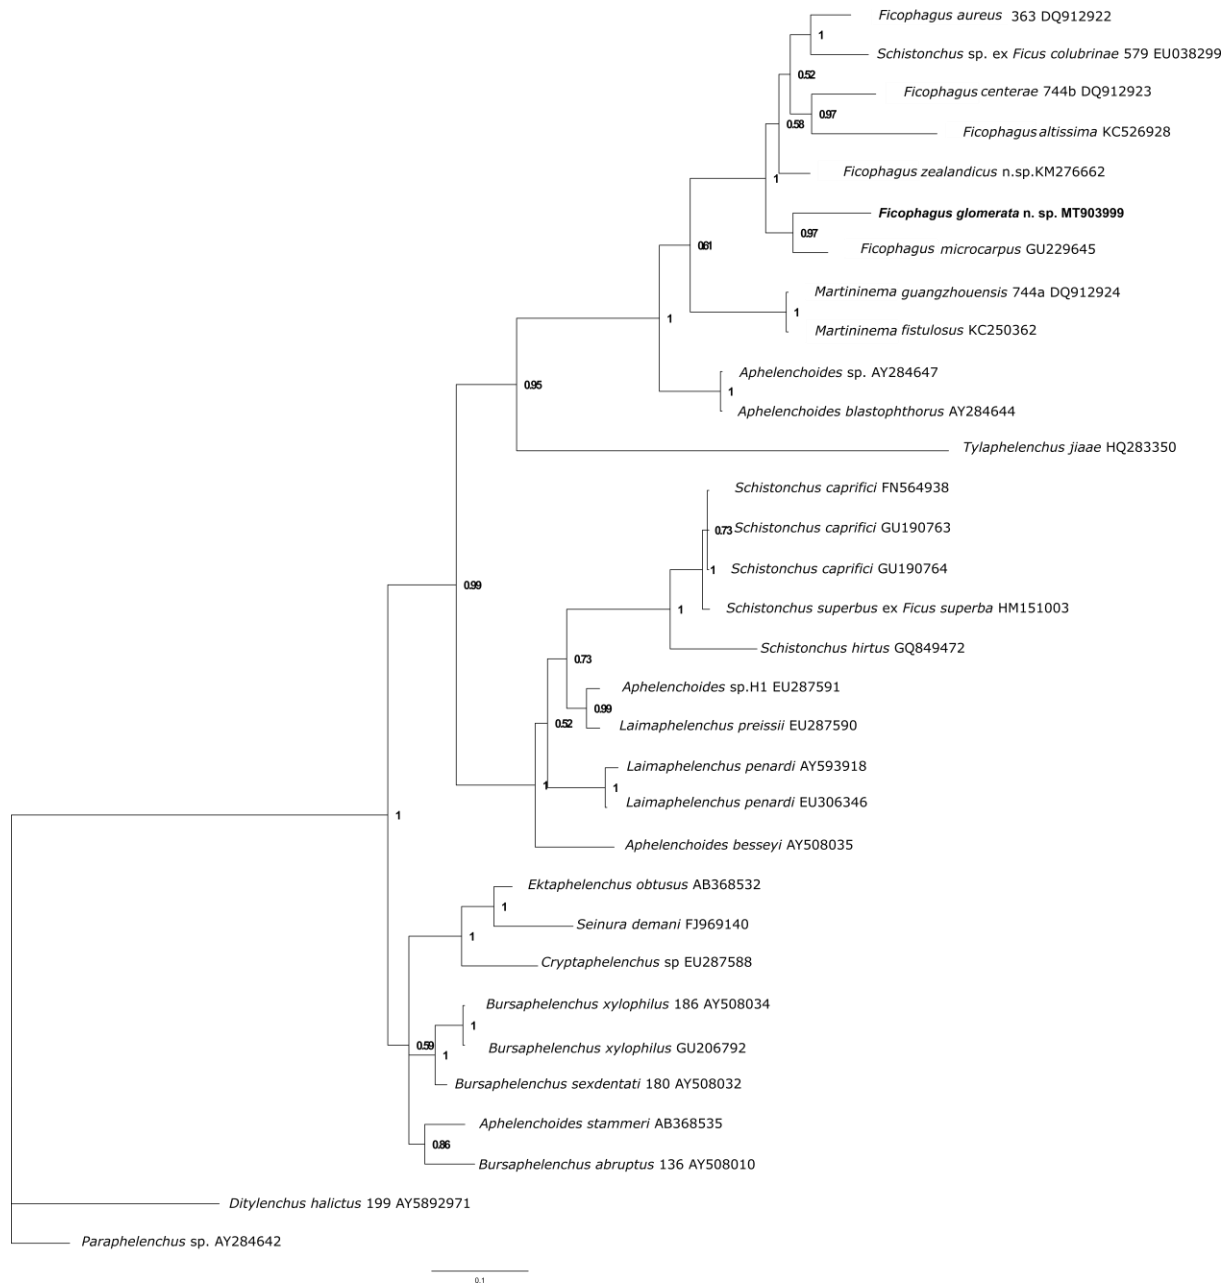

**Fig. 4.** The Bayesian tree inferred from the 18S gene for *Ficophagus glomerata* n. sp. under the GTR + I + G model (lnL = 5957.9728; freqA = 0.2547; freqC = 0.1966; freqG = 0.2654; freqT = 0.2833; R (a) = 0.0959; R (b) = 0.2182; R (c) = 0.1305; R (d) = 0.0852; R (e) = 0.4025; R (f) = 0.0676; Pinva = 0.27; Shape = 0.593). The accession numbers of the compared sequences are indicated in the form: SSU. Posterior probability values exceeding 50% are given on appropriate clades.

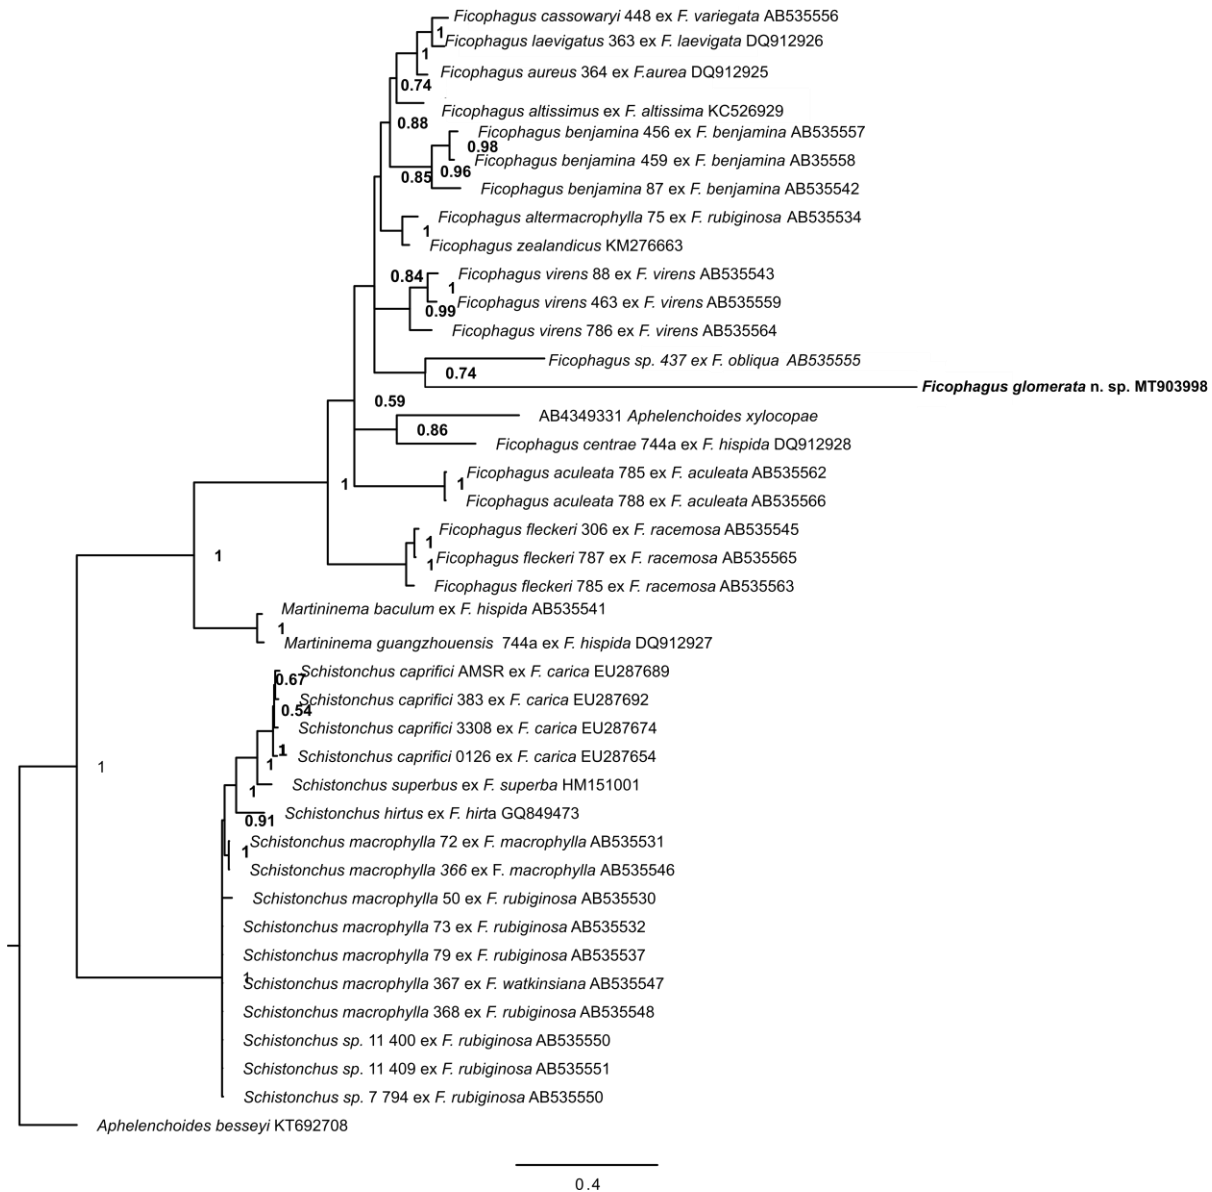

**Fig. 5.** The Bayesian tree inferred from the 28S gene for *Ficophagus glomerata* n. sp. under the GTR + I + G model (lnL = 9439.3496; freqA = 0.2437; freqC = 0.1807; freqG = 0.2957; freqT = 0.28; R (a) = 0.0592; R (b) = 0.2708; R (c) = 0.1709; R (d) = 0.0879; R (e) = 0.397; R (f) = 0.0772; Pinva = 0.0117; Shape = 0.7021). The accession numbers of the compared sequences are indicated in the form: D2-D3 LSU. Posterior probability values exceeding 50% are given on appropriate clades.

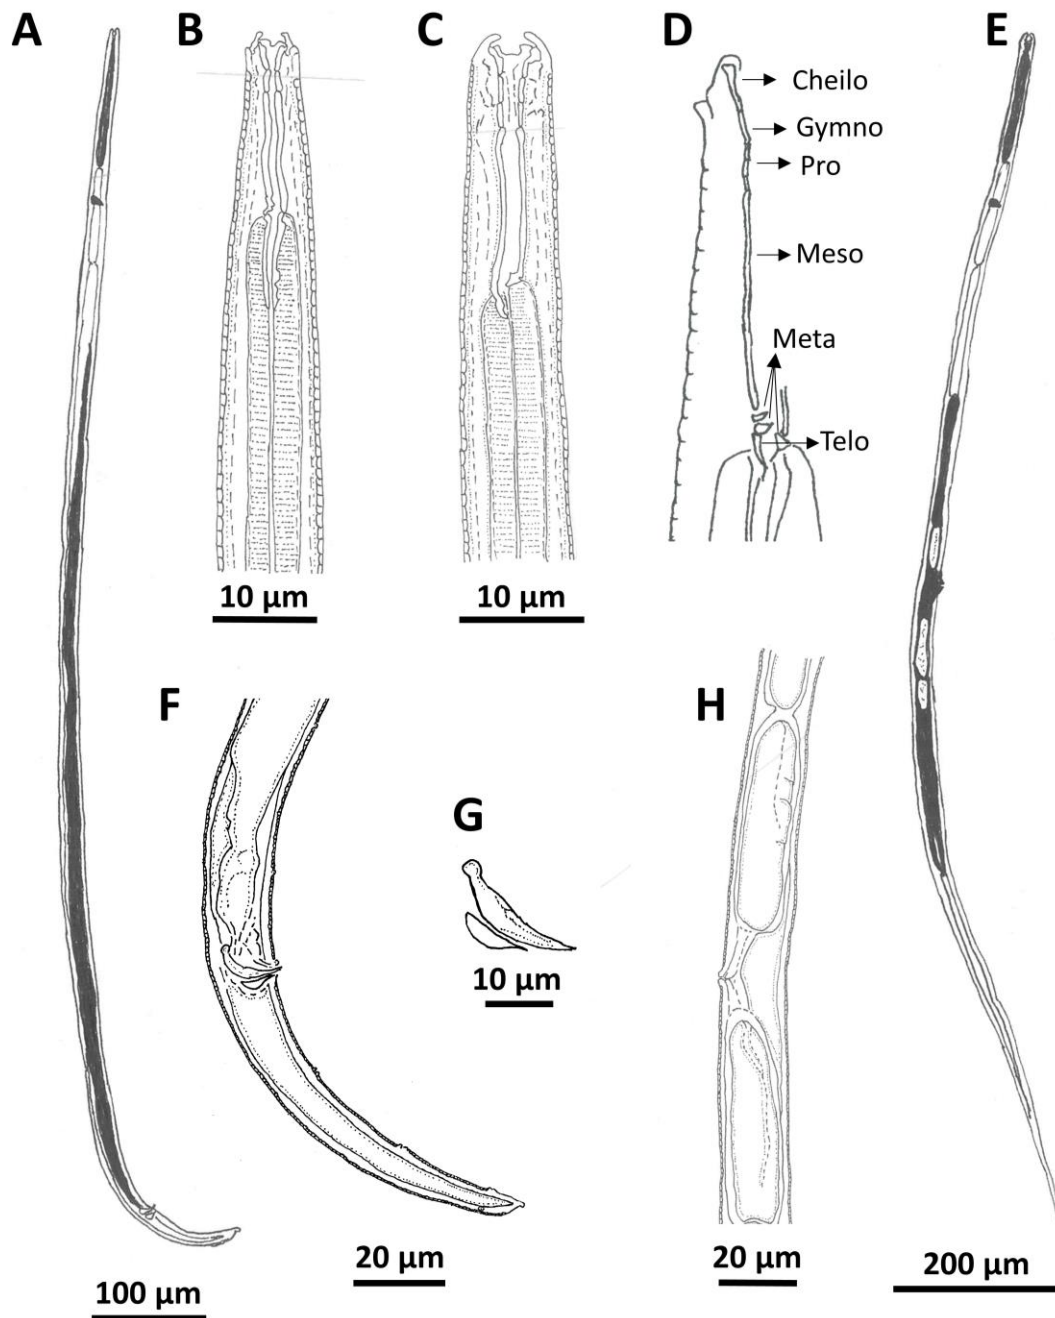

**Fig. 6.** *Teratodiplogatser glomerata* n. sp. lateral view (A) Habitus of male, (B) Anterior region of male, (C) Anterior region of female, (D) Schematic representation of lateral view of stomatal morphology, (E) Habitus of male, (F) Tail region of male, (G) Spicule and gubernaculum and (H) Vulval region of female.

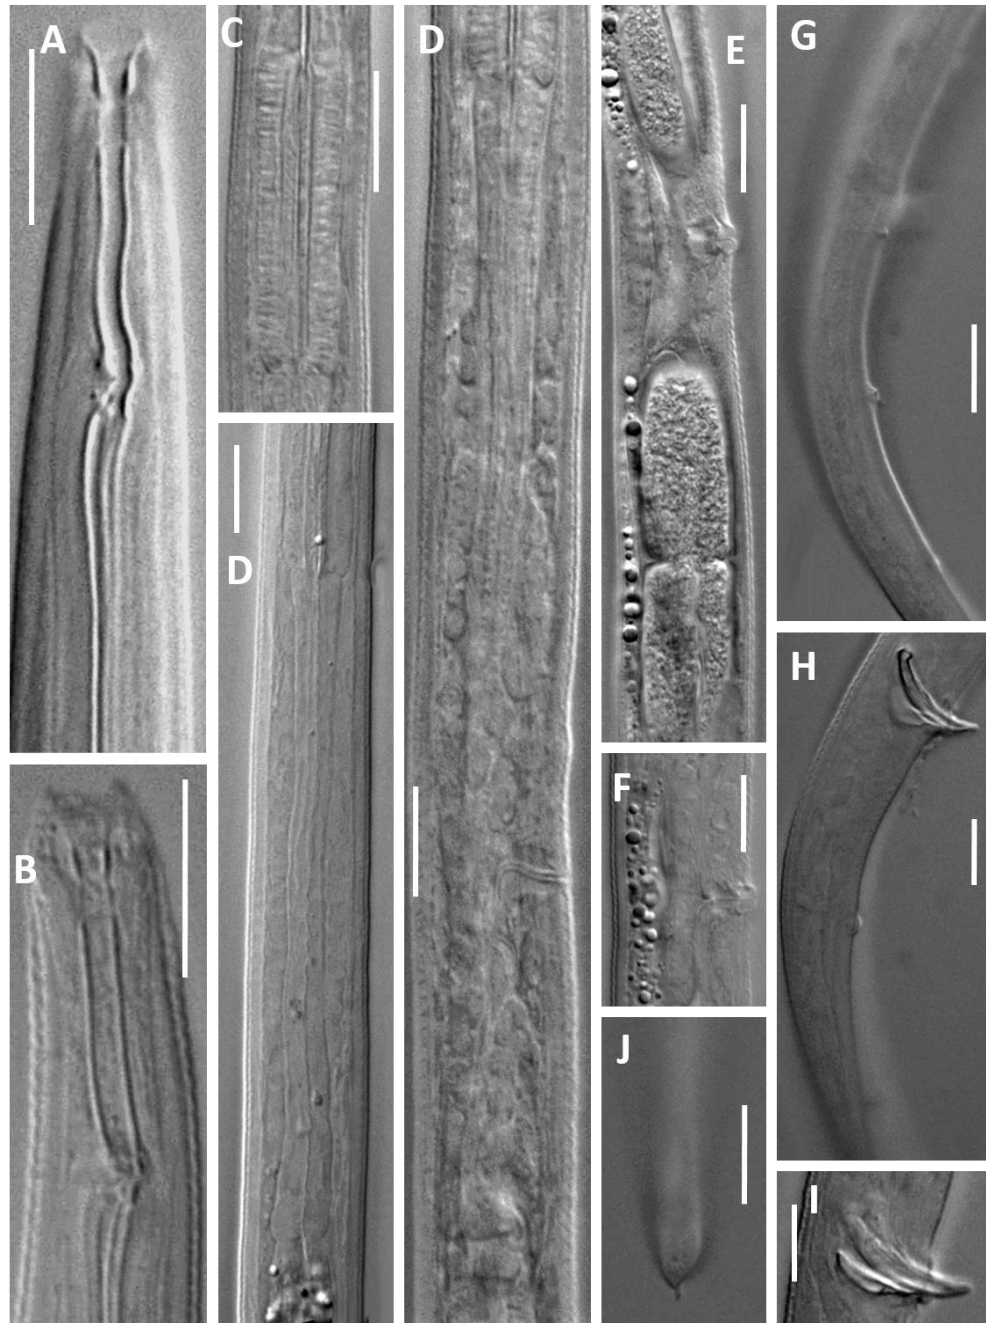

**Fig. 7.** Photomicrographs of *Teratodiplogaster glomerata* n. sp. (A, B) Head morphology of a male and female respectively. Anterior and posterior pharynx (C – D), (E) Female gonadal region showing vulva region showing the vulval opening and the eggs, (F) vulval opening, (G – H) Tail region of a male at different focal planes showing genital papillae, (I) the male spicule, and (J) the mucronated tip. Scale bar: (A – J) 10  $\mu$ m.



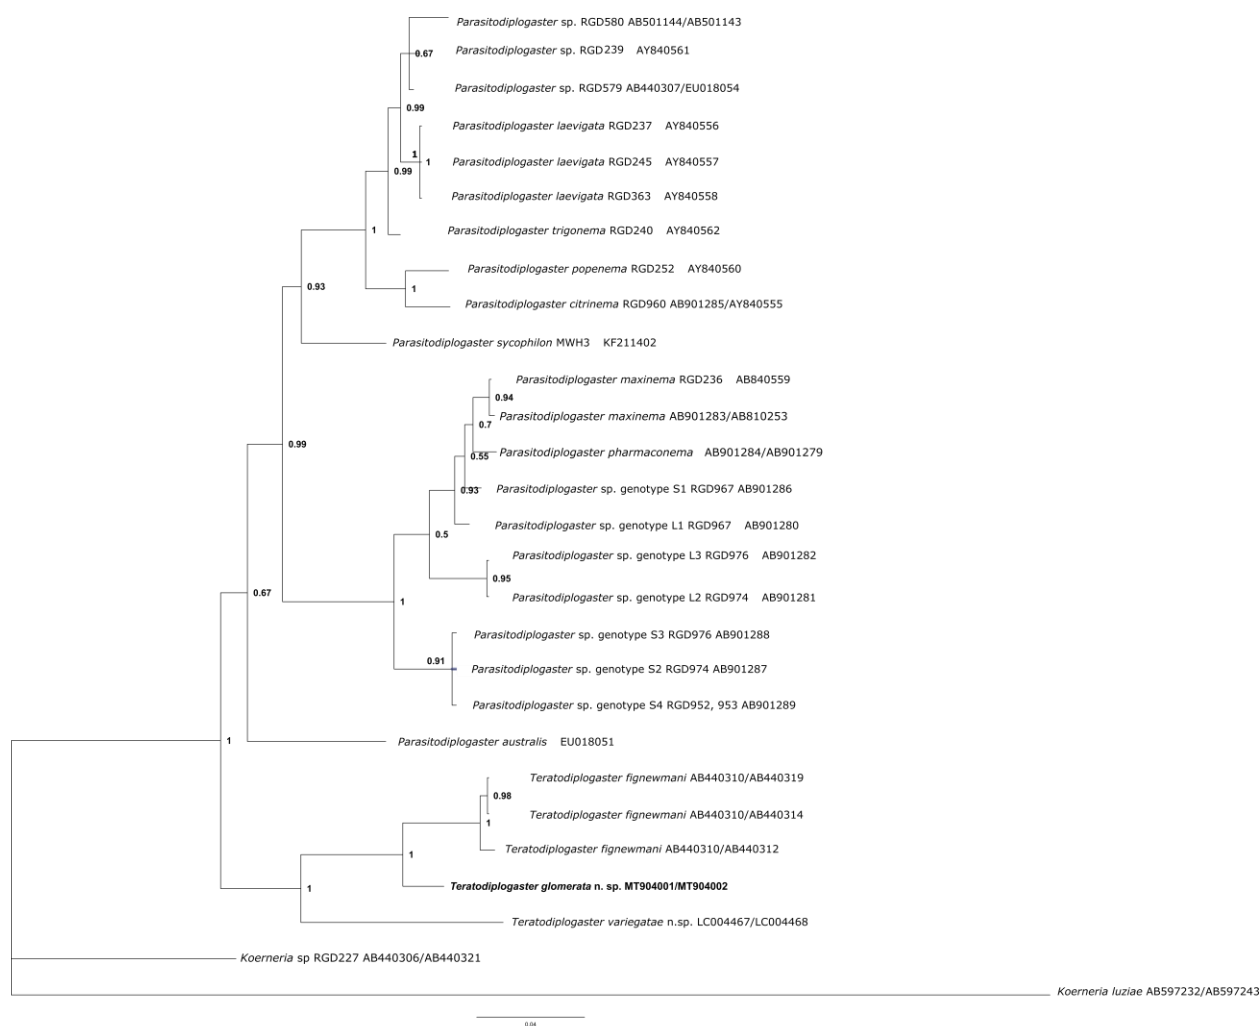

**Fig. 8.** The Bayesian tree inferred from the 18S and 28S gene for *Teratodiplogaster glomerata* n. sp. under the GTR + I + G model (lnL = 6263.9613; freqA = 0.1647; freqC = 0.2377; freqG = 0.336; freqT = 0.2617; R (a) = 0.0565; R (b) = 0.2121; R (c) = 0.1209; R (d) = 0.0504; R (e) = 0.4818; R (f) = 0.0783; Pinva = 0.251; Shape = 0.915). The accession numbers of the compared sequences are indicated in the form: SSU/D2-D3 LSU. Posterior probability values exceeding 50% are given on appropriate clades.

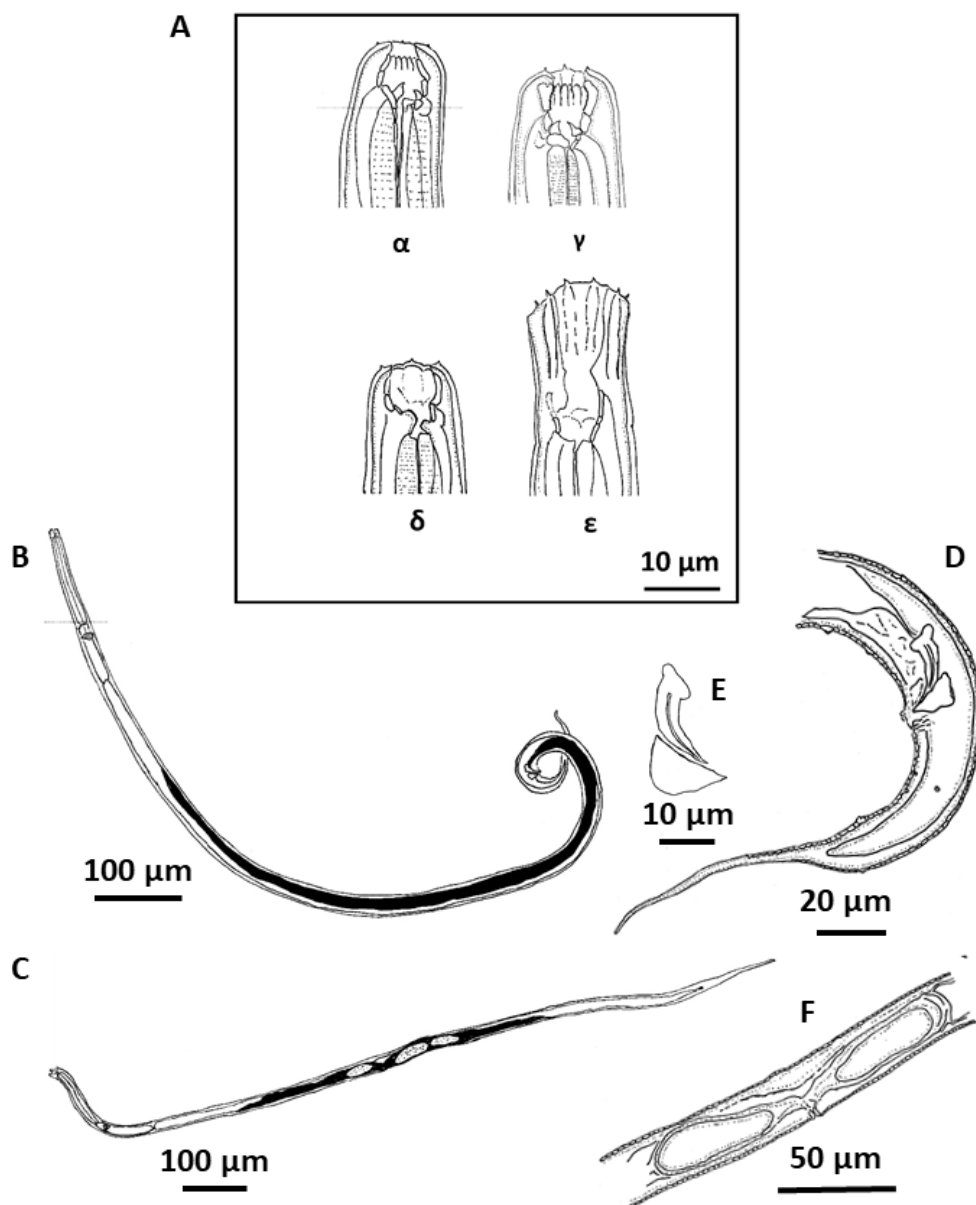

**Fig. 9.** *Pritionchus glomerata* n. sp. lateral view (A) Different morphs anterior structure, (B) Habitus of male, (C) Habitus of female, (D) Tail region of male, (E) Spicule and (F) Vulval region of female.

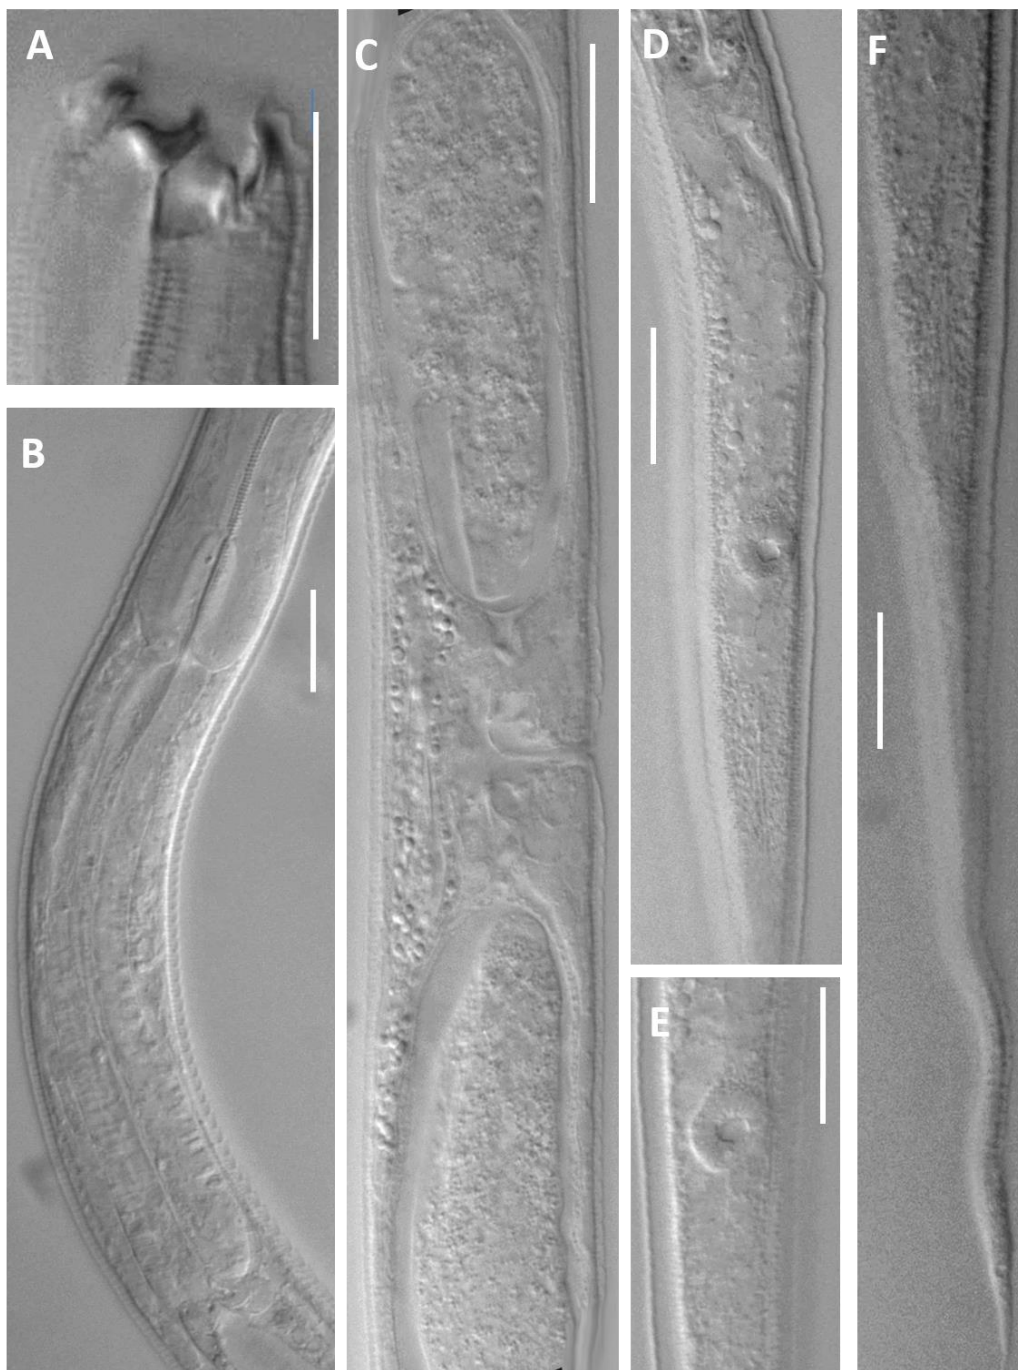

**Fig. 10.** Photomicrographs of  $\alpha$  morph (adult females only) of *Pristionchus glomerata* n. sp. (A) Head morphology, (B) Anterior and posterior pharynx, (C) different focal plane, arrows show spicule in A and capitulum in B, (D) Gonadal region of female showing vulval opening and eggs, (E) Anal opening and tail region (E – F). Scale bar: (A – F) 10  $\mu$ m.



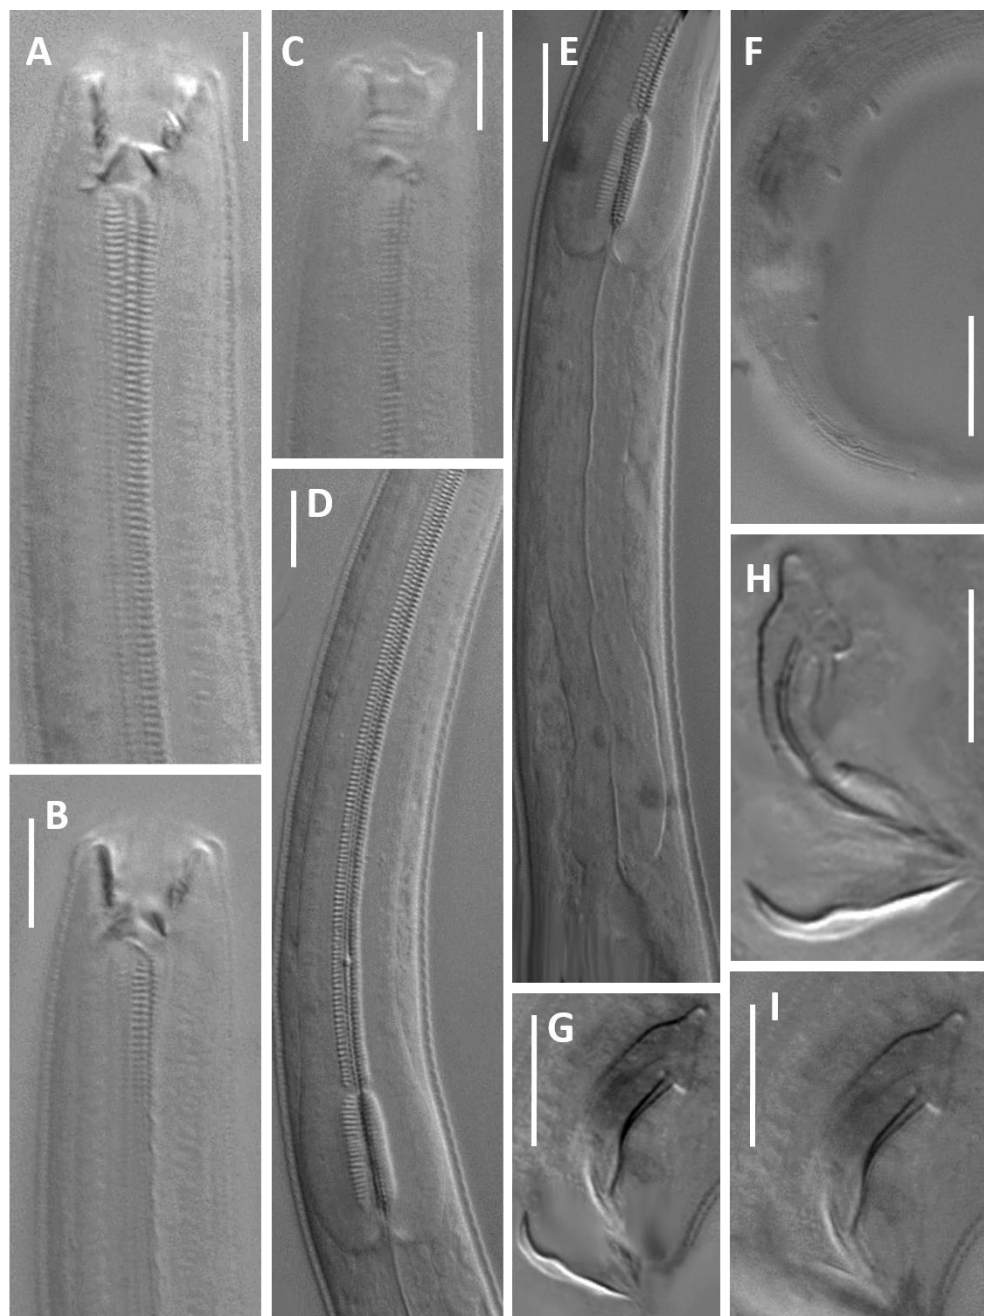

**Fig. 11.** Photomicrographs of  $\gamma$  morph (adult males only) of *Pristionchus glomerata* n. sp. (A – C) Head morphology at different focal planes, (D) Anterior pharynx, (E) Posterior pharynx, (F) Genital papillae, (G – I) male spicule and capitulum at different focal planes. Scale bar: (A – I) 10  $\mu$ m.

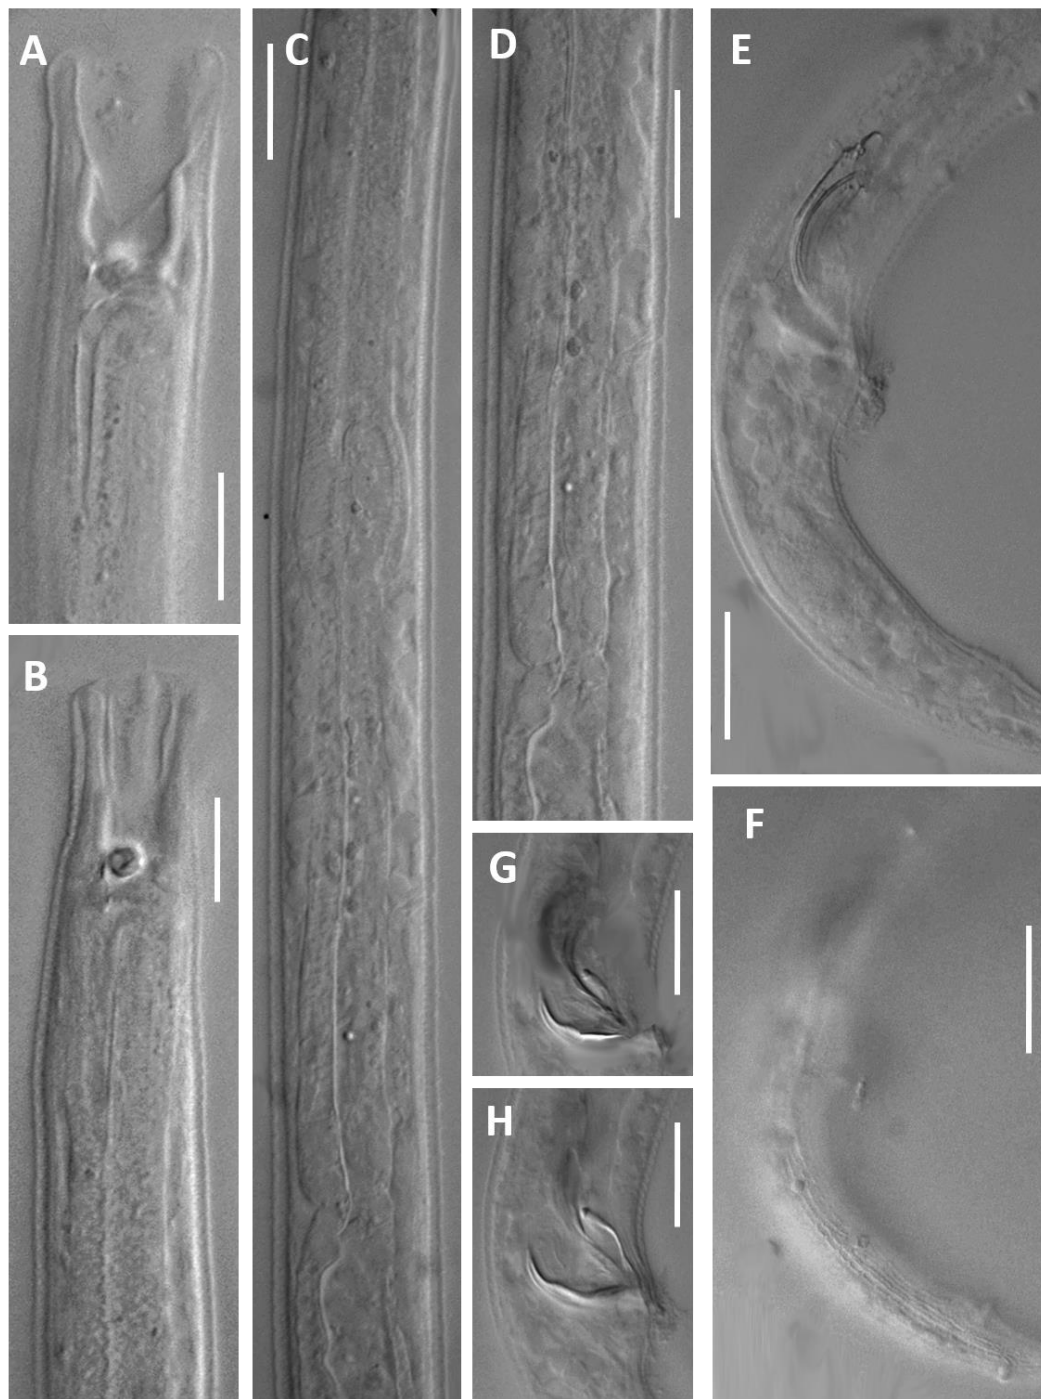

**Fig. 12.** Photomicrographs of  $\epsilon$  morph (adult males only) of *Pristionchus glomerata* n. sp. (A – B) Head morphology at different focal planes, (C – D) Anterior pharynx and posterior pharynx, (E – F) Tail region at different focal planes showing genital papillae, (G – H) male spicule and capitulum at different focal planes. Scale bar: (A – H) 10  $\mu$ m.

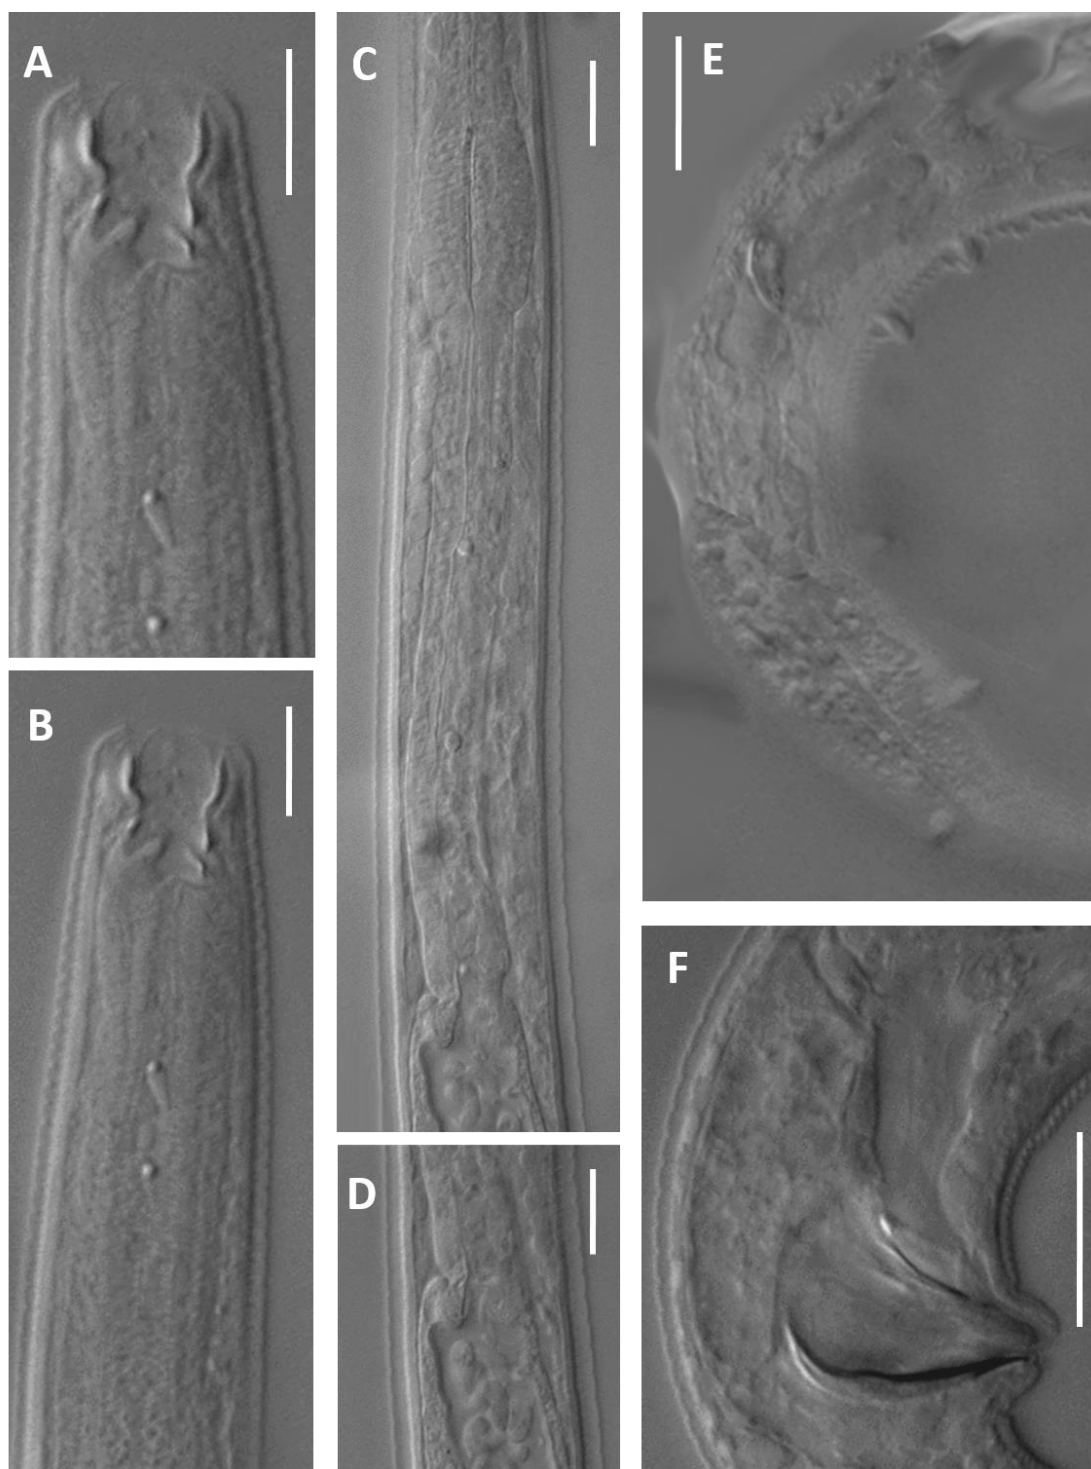

**Fig. 13.** Photomicrographs of  $\delta$  morph (adult males only) of *Pristionchus glomerata* n. sp. (A – B) Head morphology at different focal planes, (C – D) Anterior and posterior pharynx, (E) Genital papillae, (F) male spicule and capitulum. Scale bar: (A – F) 10  $\mu$ m.

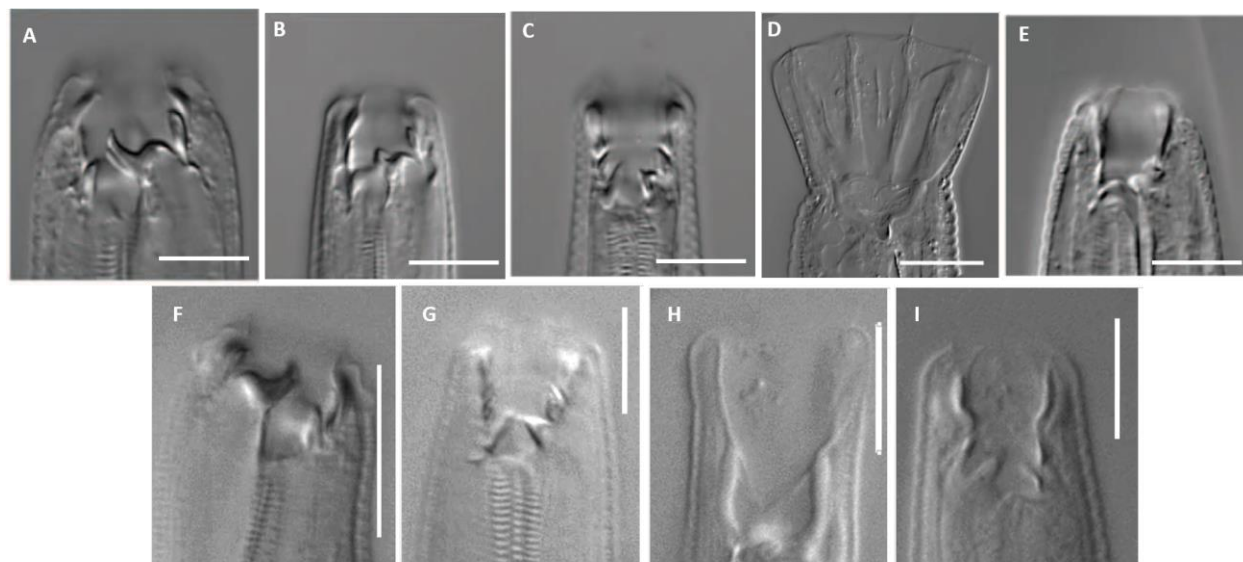

**Fig. 14.** Discrete comparable adult morphs present in *P. racemosae* (A–E)[taken from Susoy *et al.* 2016) and *P. glomerata* n. sp. (F–I). The species morphs of *P. racemosae* (from left to right) :  $\alpha$ ,  $\beta$ ,  $\gamma$ ,  $\epsilon$  and  $\delta$  and for *P. glomerata* n. sp. (from left to right):  $\alpha$ ,  $\gamma$ ,  $\epsilon$  and  $\delta$  Scale bar: (D) 20  $\mu\text{m}$ , (A–C, E–I) 10  $\mu\text{m}$ .



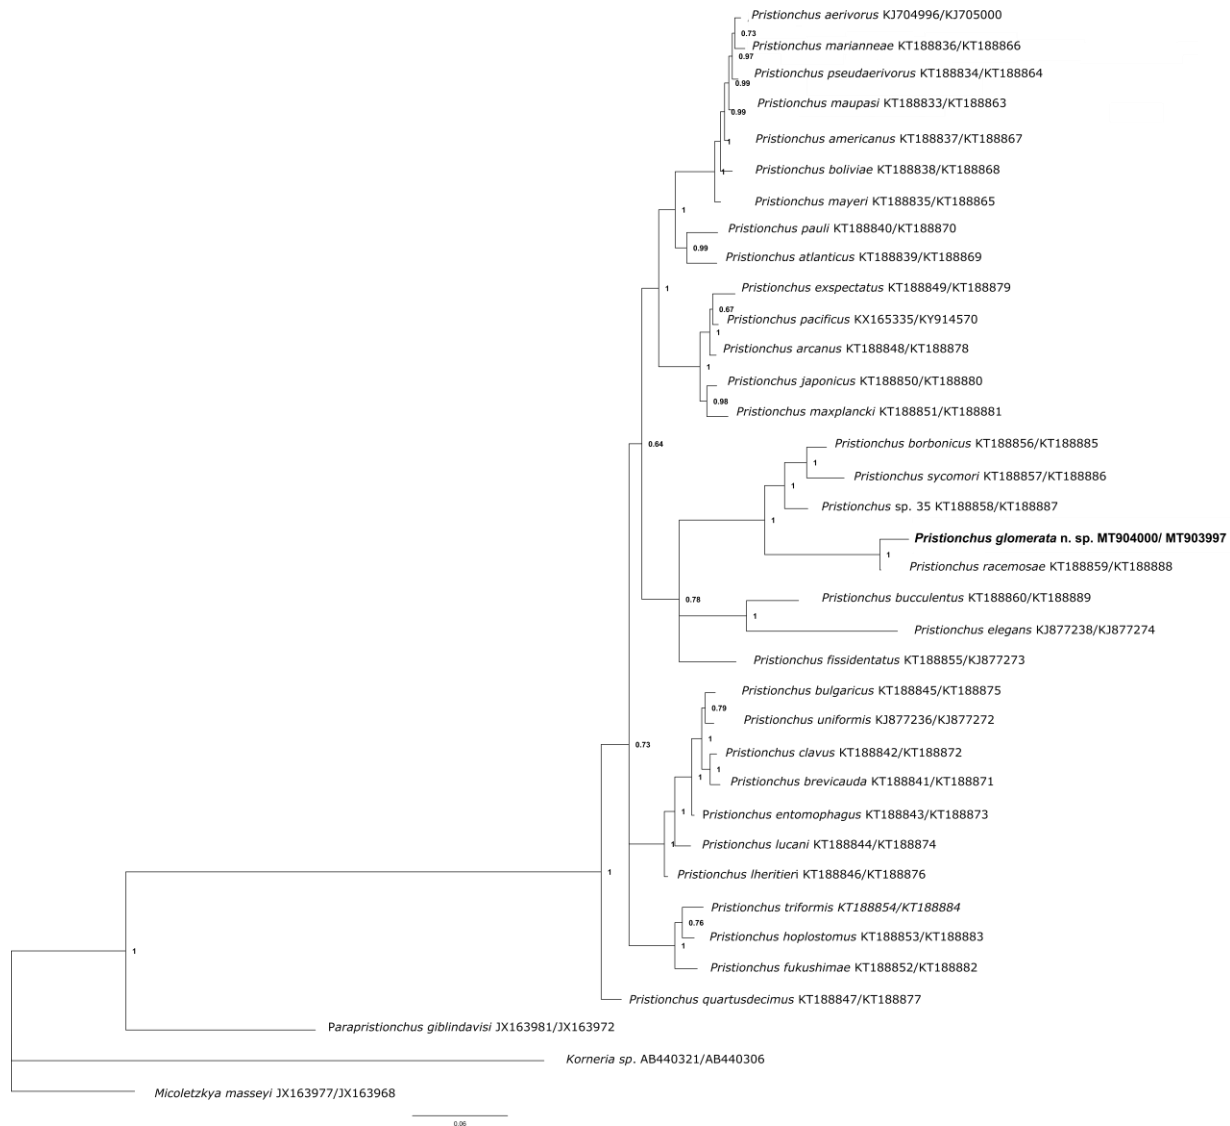

**Fig. 15.** The Bayesian tree inferred from the 18S and 28S gene for *Pristionchus glomerata* n. sp. under the GTR + I + G model (lnL = 8781.2399; freqA = 0.2345; freqC = 0.1834; freqG = 0.3026; freqT = 0.2795; R (a) = 0.0543; R (b) = 0.2938; R (c) = 0.1071; R (d) = 0.0836; R (e) = 0.3843; R (f) = 0.0769; Pinva = 0.168; Shape = 0.852). The accession numbers of the compared sequences are indicated in the form: SSU/D2-D3 LSU. Posterior probability values exceeding 50% are given on appropriate clades.

**Table 1.** Morphometric characteristics of *Ficophagus glomerata* n. sp. All measurements are in  $\mu\text{m}$  and in the form: mean  $\pm$  s.d. (range).

| Character                            | <i>Ficophagus glomerata</i> n. sp. |                               |                                |
|--------------------------------------|------------------------------------|-------------------------------|--------------------------------|
|                                      | Male                               |                               | Female                         |
|                                      | Holotype                           | Paratypes                     | Paratypes                      |
| n                                    |                                    | 9                             | 10                             |
| L                                    | 525                                | 567 $\pm$ 58<br>(469-656)     | 761 $\pm$ 81<br>(604-886)      |
| a                                    | 25                                 | 26.5 $\pm$ 2.4<br>(23.4-30.9) | 24.0 $\pm$ 2.3<br>(20-28)      |
| b                                    | 7.3                                | 7.4 $\pm$ 0.3<br>(6.7-7.8)    | 7.6 $\pm$ 1.4<br>(5.2-9.6)     |
| c                                    | 17.2                               | 16.6 $\pm$ 2.6<br>(12-20)     | 20.7 $\pm$ 1.6<br>(18-23)      |
| c'                                   | 1.8                                | 2.0 $\pm$ 0.4<br>(1.5-2.7)    | 1.6 $\pm$ 0.2<br>(1.3- 1.9)    |
| T or V (%)                           | 76.9                               | 72 $\pm$ 3.3<br>(65-77)       | 68.6 $\pm$ 4.9<br>(61.2-76.7)  |
| Max. body diam.                      | 20.9                               | 21.3 $\pm$ 1.0<br>(19-23)     | 31.4 $\pm$ 0.7<br>(30.2-32.1)  |
| Stylet length                        | 21.2                               | 21.3 $\pm$ 0.6<br>(20-22)     | 22.0 $\pm$ 0.9<br>(20-23)      |
| Median bulb (length)                 | 16.6                               | 16.2 $\pm$ 0.6<br>(14-17)     | 14.3 $\pm$ 0.9<br>(12.4 -15.6) |
| Median bulb (width)                  | 10.6                               | 10.6 $\pm$ 0.3<br>(10-11)     | 10.4 $\pm$ 0.5<br>(10-11)      |
| Ant.enf to SE pore                   | 14                                 | 14 $\pm$ 0.7<br>(13-15)       | 14.5 $\pm$ 0.8<br>(13-16)      |
| Ant. end to base of metacarpus       | 55                                 | 59 $\pm$ 5.5<br>(51-68)       | 64.6 $\pm$ 2.3<br>(62-69)      |
| Ant. end to base of pharyngeal gland | 114                                | 80.4 $\pm$ 12<br>(68-114)     | 101.5 $\pm$ 15<br>(78-114)     |
| Nerve ring from anterior end         | 68                                 | 70.8 $\pm$ 6<br>(62-82)       | 77.9 $\pm$ 6.1<br>(71-87.4)    |
| Post uterine sac                     | -                                  | -                             | 6.0 $\pm$ 0.3<br>(5.4-6.3)     |
| Tail length                          | 35.1                               | 33.5 $\pm$ 6.6<br>(23.6-42)   | 38.9 $\pm$ 2.1<br>(34.5-42.3)  |
| Spicule length (chord)               | 16.6                               | 16.8 $\pm$ 1<br>(14-17)       |                                |

**Table 2.** Comparative morphometric data of *Ficophagus glomerata* n. sp., other congeners and two *Schistonchus* sp. described from India, associated with *Ficus racemosa*. All measurements are in  $\mu\text{m}$  and in the form mean  $\pm$  s.d. (range).

| Character            | <i>S. racemosa</i> |                  | <i>S. osmani</i> |             | <i>F. aculeate</i>         |                            | <i>F. fleckeri</i>         |                            | <i>F. altermacrophylla</i> |                           | <i>F. cuculloracemosus</i>     |                                | <i>F. flagelloracemosus</i>   |                                      | <i>F. glomerata</i> n. sp. *  |                                |
|----------------------|--------------------|------------------|------------------|-------------|----------------------------|----------------------------|----------------------------|----------------------------|----------------------------|---------------------------|--------------------------------|--------------------------------|-------------------------------|--------------------------------------|-------------------------------|--------------------------------|
|                      | Male               | Female           | Male             | Female      | Male                       | Female                     | Male                       | Female                     | Male                       | Female                    | Male                           | Female                         | Male                          | Female                               | Male                          | Female                         |
|                      | Paratypes          | Paratypes        | Paratypes        | Paratypes   | Paratypes                  | Paratypes                  | Paratypes                  | Paratypes                  | Paratypes                  | Paratypes                 | Paratypes                      | Paratypes                      | Paratypes                     | Paratypes                            | Paratypes                     | Paratypes                      |
| n                    | 35                 | 35               | 30               | 30          | 15                         | 14                         | 22                         | 27                         | 12                         | 10                        | 11                             | 14                             | 12                            | 15                                   | 9                             | 10                             |
| L                    | 653<br>(500-660)   | 792<br>(600-800) | (700-840)        | (718-910)   | 450 $\pm$ 33<br>(396-523)  | 619 $\pm$ 35<br>(548-671)  | 547 $\pm$ 32<br>(498-609)  | 727 $\pm$ 78<br>(572-889)  | 560 $\pm$ 44<br>(445-618)  | 500 $\pm$ 49<br>(411-571) | 523.6 $\pm$ 56.1<br>(441-609)  | 785.7 $\pm$ 57.5<br>(707-906)  | 379.8 $\pm$ 28.6<br>(342-446) | 475.9 $\pm$ 18.3<br>(442-504)        | 567 $\pm$ 58<br>(469-656)     | 761 $\pm$ 81<br>(604-886)      |
| a                    | 26<br>(24-26)      | 117.2<br>(14-21) | (26-30)          | (27-34)     | 27 $\pm$ 2.8<br>(23-33)    | 18 $\pm$ 2.2<br>(14-23)    | 30 $\pm$ 1.5<br>(27-33)    | 23 $\pm$ 3.9<br>(15-35)    | 28 $\pm$ 2<br>(25-31)      | 22 $\pm$ 3<br>(17-29)     | 26.6 $\pm$ 1.57<br>(24.5-29.3) | 22.1 $\pm$ 2.81<br>(17.6-27.8) | 27.3 $\pm$ 3.3<br>(22.8-32.9) | 26.9 $\pm$ 1.52<br>(24.3-30.4)       | 26.5 $\pm$ 2.4<br>(23.4-30.9) | 24.0 $\pm$ 2.3<br>(20-28)      |
| b                    | 5.4<br>(5.2-6.2)   | (5.2-6.2)        | (10-13)          | (11.5-13.5) | 3.3 $\pm$ 0.2<br>(2.6-4.0) | 4.9 $\pm$ 0.2<br>(4.7-5.1) | 5.5 $\pm$ 0.5<br>(4.8-6.4) | 7.2 $\pm$ 0.3<br>(7.0-7.4) | 4 $\pm$ 0.6<br>(3-5)       | 5 $\pm$ 1.2<br>(3-8)      | 7.9 $\pm$ 0.88<br>(6.0-9.5)    | 12.3 $\pm$ 1.12<br>(10.9-15.1) | 9.1 $\pm$ 0.84<br>(8.1-11.2)  | 9 $\pm$ 0.54<br>(8.0-10.1)           | 7.4 $\pm$ 0.3<br>(6.7-7.8)    | 7.6 $\pm$ 1.4<br>(5.2-9.6)     |
| c                    | 28<br>(22-28)      | 21.6<br>(18-22)  | (12-15)          | (14.8-19.6) | 12.2 $\pm$ 1.0<br>(11-14)  | 19.3 $\pm$ 2.0<br>(17-23)  | 18 $\pm$ 1.5<br>(16-21)    | 21 $\pm$ 3.4<br>(12-29)    | 15 $\pm$ 1<br>(13-16)      | 17 $\pm$ 2<br>(14-21)     | 17.6 $\pm$ 1.3<br>(16-20.5)    | 16.9 $\pm$ 2.36<br>(14.5-21.1) | 24.3 $\pm$ 2.1<br>(21.1-27.5) | 13.9 $\pm$ 1.1<br>(12.8-16.8)        | 16.6 $\pm$ 2.6<br>(12-20)     | 20.7 $\pm$ 1.6<br>(18-23)      |
| c'                   | -                  | -                | -                | -           | 2.3 $\pm$ 0.2<br>(1.8-2.8) | 2.4 $\pm$ 0.4<br>(2.0-3.1) | 1.9 $\pm$ 0.2<br>(1.6-2.4) | 2.6 $\pm$ 0.7<br>(1.6-4.6) | 2 $\pm$ 0.2<br>(1.7-2.4)   | 3 $\pm$ 0.3<br>(2.8-3.8)  | 1.8 $\pm$ 0.14<br>(1.7-1.9)    | 3.4 $\pm$ 0.5<br>(2.7-4.1)     | 1.3 $\pm$ 0.09<br>(1.2-1.4)   | 4.5 $\pm$ 0.48<br>(3.4-5.2)          | 2.0 $\pm$ 0.4<br>(1.5-2.7)    | 1.6 $\pm$ 0.2<br>(1.3- 1.9)    |
| T or V (%)           | 31<br>(30-48)      | 60<br>(60-76)    | -                | (78-84)     | 55 $\pm$ 1<br>(48-57)      | 75 $\pm$ 1.2<br>(73-77)    | 41 $\pm$ 13.4<br>(22-80)   | 76 $\pm$ 4.3<br>(67-86)    | 330 $\pm$ 49<br>(273-401)  | 85 $\pm$ 9<br>(70-95)     | -                              | 73.2 $\pm$ 2.0<br>(70.1-77.6)  | -                             | 76.2 $\pm$ 0.96<br>(74.7 $\pm$ 78.2) | 72 $\pm$ 3.3<br>(65-77)       | 68.6 $\pm$ 4.9<br>(61.2-76.7)  |
| Max. body diam.      | -                  | -                | (25-28.5)        | (21-27)     | 17 $\pm$ 1<br>(15-19)      | 34 $\pm$ 3<br>(29-40)      | 18 $\pm$ 1.5<br>(15-19)    | 33 $\pm$ 7<br>(19-54)      | 18 $\pm$ 2<br>(15-19)      | 23 $\pm$ 2<br>(19-25)     | -                              | -                              | -                             | -                                    | 21.3 $\pm$ 1.0<br>(19-23)     | 31.4 $\pm$ 0.7<br>(30.2-32.1)  |
| Stylet length        | -                  | 23<br>(21-24)    | (19-21)          | (21-27)     | 15 $\pm$ 2<br>(13-18)      | 14 $\pm$ 1.5<br>(13-17)    | 17 $\pm$ 0.8<br>(15-17)    | 18 $\pm$ 1.5<br>(15-19)    | 22 $\pm$ 3<br>(16-25)      | 21 $\pm$ 2<br>(17-26)     | 22<br>(22)                     | 22<br>(22)                     | 14<br>(14)                    | 14<br>(14)                           | 21.3 $\pm$ 0.6<br>(20-22)     | 22.0 $\pm$ 0.9<br>(20-23)      |
| Median bulb (length) | 17<br>(13-17)      | 17<br>(13-17)    | (10-12)          | (12-13)     | -                          | -                          | -                          | -                          | -                          | -                         | -                              | -                              | -                             | -                                    | 16.2 $\pm$ 0.6<br>(14-17)     | 14.3 $\pm$ 0.9<br>(12.4 -15.6) |
| Median bulb (width)  | 13<br>(10-13)      | 15<br>(12-15)    | (8-9)            | (8-9)       | -                          | -                          | -                          | -                          | -                          | -                         | -                              | -                              | -                             | -                                    | 10.6 $\pm$ 0.3<br>(10-11)     | 10.4 $\pm$ 0.5<br>(10-11)      |
| Ant. end to Ex pore  | -                  | -                | -                | -           | 6 $\pm$ 2.0<br>(4-9)       | 6 $\pm$ 1.1<br>(5-8)       | 10 $\pm$ 1.4<br>(8-11)     | 8.0 $\pm$ 0.6<br>(7-8)     | 6 $\pm$ 1<br>(3-7)         | 6 $\pm$ 2<br>(5-9)        | 10 $\pm$ 1.89<br>(7-12)        | 10.1 $\pm$ 1.8<br>(7-14)       | 16.7 $\pm$ 2.0<br>(12-19)     | 11.4 $\pm$ 0.44<br>(11-13)           | 14 $\pm$ 0.7<br>(13-15)       | 14.5 $\pm$ 0.8<br>(13-16)      |

|                                   |   |   |           |   |                      |                      |                     |                       |                       |                      |                      |                      |                      |                      |                         |                           |
|-----------------------------------|---|---|-----------|---|----------------------|----------------------|---------------------|-----------------------|-----------------------|----------------------|----------------------|----------------------|----------------------|----------------------|-------------------------|---------------------------|
| Ant. End to base metacarpus       | - | - | -         | - | 53 ± 3<br>(49-58)    | 54 ± 7<br>(47-77)    | 66 ± 3.7<br>(60-73) | 58 ± 9.5<br>(41-87)   | 65 ± 7<br>(60-71)     | 69 ± 6<br>(55-77)    | -                    | -                    | -                    | -                    | 59 ± 5.5<br>(51-68)     | 64.6 ± 2.3<br>(62-69)     |
| Ant. End to base pharyngeal gland | - | - | -         | - | 135 ± 7<br>(123-154) | 127 ± 5<br>(117-135) | 100 ± 6<br>(87-110) | 119 ± 11<br>(112-127) | 130 ± 20<br>(112-163) | 10 ± 20<br>(114-168) | -                    | -                    | -                    | -                    | 80.4 ± 12<br>(68-114)   | 101.5 ± 15<br>(78-114)    |
| Nerve ring from anterior end      | - | - | -         | - | 60 ± 3<br>(53-65)    | 57 ± 4<br>(52-63)    | 72 ± 4.5<br>(65-78) | 66 ± 3<br>(61-70)     | 72 ± 8<br>(60-85)     | 76 ± 8<br>(60-83)    | -                    | -                    | -                    | -                    | 70.8 ± 6<br>(62-82)     | 77.9 ± 6.1<br>(71-87.4)   |
| Post uterine sac                  | - | - | -         | - | -                    | 6 ± 1.5<br>(4-9)     | -                   | 18 ± 8<br>(6-39)      | -                     | 14 ± 3<br>(8-20)     | -                    | -                    | -                    | -                    | -                       | 6.0 ± 0.3<br>(5.4-6.3)    |
| Tail length                       | - | - | -         | - | 37 ± 4<br>(31-43)    | 32 ± 3<br>(28-36)    | 30 ± 3<br>(26-38)   | 37 ± 8<br>(24-62)     | 34 ± 2<br>(28-37)     | 29 ± 4<br>(23 -34)   | 29.7±2.1<br>(25-32)  | 47.3±7.58<br>(35-62) | 15.7±0.86<br>(14-16) | 34.3±2.58<br>(30-38) | 33.5 ± 6.6<br>(23.6-42) | 38.9 ± 2.1<br>(34.5-42.3) |
| Spicule length (chord)            | - | - | (37-39.5) | - | 16 ± 1<br>(15-17)    | -                    | 17 ± 0.9<br>(16-18) | -                     | 21 ± 2<br>(18-24)     | -                    | 21.4±0.67<br>(20-22) | -                    | 10.1±0.5<br>(9-11)   | -                    | 16.8 ± 1<br>(14-17)     | -                         |



**Table 3.** Comparative morphometric data of *Teratodiplogaster glomerata* n. sp. and other congeners associated with *Ficus racemosa*. All measurements are in  $\mu\text{m}$  and in the form: mean  $\pm$  s.d. (range).

| Character                | <i>T. variegatae</i>          |                               | <i>T. fignewmani</i>          |                                | <i>T. martini</i>             |                               | <i>T. racemosus</i>               |                                   | <i>T. glomerata</i> n. sp. |                               |                               |
|--------------------------|-------------------------------|-------------------------------|-------------------------------|--------------------------------|-------------------------------|-------------------------------|-----------------------------------|-----------------------------------|----------------------------|-------------------------------|-------------------------------|
|                          | Male                          | Female                        | Male                          | Female                         | Male                          | Female                        | Male                              | Female                            | Male                       | Female                        |                               |
|                          | Paratypes                     | Paratypes                     | Paratypes                     | Paratypes                      | Paratypes                     | Paratypes                     | Paratypes                         | Paratypes                         | Holotype                   | Paratypes                     | Paratypes                     |
| n                        | 9                             | 10                            | 10                            | 11                             | 10                            | 13                            | 9                                 | 13                                |                            | 9                             | 10                            |
| L                        | 1019 $\pm$ 117<br>(854-1283)  | 965 $\pm$ 120<br>(805-1173)   | 2119 $\pm$ 311<br>(1850-2700) | 2705 $\pm$ 636<br>(2160-3895)  | 2171 $\pm$ 267<br>(1825-2650) | 2253 $\pm$ 325<br>(1750-3100) | 1771.1 $\pm$ 295.6<br>(1412-2184) | 2030.9 $\pm$ 236.2<br>(1587-2444) | 1329                       | 1271 $\pm$ 48<br>(1195-1345)  | 1506 $\pm$ 83<br>(1388-1657)  |
| a                        | 40.9 $\pm$ 4.6<br>(29.9-47.4) | 30.7 $\pm$ 5.8<br>(26.1-45.6) | 67.8 $\pm$ 6.6<br>(52.9-75.9) | 79.9 $\pm$ 10.6<br>(59.0-92.0) | 62.6 $\pm$ 4.6<br>(52.6-70.0) | 67.1 $\pm$ 6.9<br>(54.5-79.5) | 77.9 $\pm$ 10<br>(66.5-92.8)      | 81.4 $\pm$ 4.4<br>(74.7-89.1)     | 63.3                       | 64.7 $\pm$ 2.9<br>(62.0-69.6) | 72.4 $\pm$ 3.4<br>(68.8-79.7) |
| b                        | 4.4 $\pm$ 0.4<br>(3.8-5.4)    | 4.2 $\pm$ 0.3<br>(3.8-4.9)    | 9.1 $\pm$ 1.3<br>(7.8-11.7)   | 11.0 $\pm$ 1.5<br>(9.5-13.5)   | 8.2 $\pm$ 0.5<br>(7.7-9.3)    | 8.1 $\pm$ 0.7<br>(6.7-9.3)    | 8.2 $\pm$ 1.1<br>(6.5-9.4)        | 8.9 $\pm$ 0.5<br>(7.7-9.8)        | 6.2                        | 6.1 $\pm$ 0.1<br>(5.9-6.3)    | 7.7 $\pm$ 0.3<br>(7.3-8.2)    |
| c                        | 16.9 $\pm$ 1.4<br>(15.0-19.7) | 18.2 $\pm$ 1.2<br>(17.0-19.9) | 19.4 $\pm$ 2.6<br>(16.9-26.0) | 13.0 $\pm$ 1.9<br>(10.2-16.4)  | 21.6 $\pm$ 2.4<br>(18.1-25.0) | 19.4 $\pm$ 2.9<br>(15.9-26.3) | 14.9 $\pm$ 1.6<br>(12.9-17.8)     | 8.3 $\pm$ 0.5<br>(7.3-11.2)       | 12                         | 11.4 $\pm$ 0.8<br>(10.6-12.8) | 10.2 $\pm$ 1.6<br>(8.3-13.0)  |
| c'                       | 3.1 $\pm$ 0.1<br>(3.0-3.4)    | 3.5 $\pm$ 0.2<br>(3.2-3.8)    | 5.1 $\pm$ 0.6<br>(3.4-5.7)    | 9.3 $\pm$ 1.8<br>(6.8-11.9)    | 4.2 $\pm$ 0.4<br>(3.5-4.9)    | 5.8 $\pm$ 0.6<br>(4.8-7.3)    | 7 $\pm$ 0.51<br>(6.2-7.9)         | 15.7 $\pm$ 1.8<br>(11.8-19)       | 7.1                        | 7 $\pm$ 0.6<br>(6.2-8.5)      | 10.9 $\pm$ 1.9<br>(7.7-13.5)  |
| T or V                   | 40.2 $\pm$ 6.2<br>(29.8-51.3) | 59.4 $\pm$ 1.0<br>(58.3-61.1) | 61.9 $\pm$ 9.2<br>(51.9-83.7) | 50.0 $\pm$ 1.5<br>(46.2-52.2)  | 69.1 $\pm$ 6.8<br>(58.5-80.6) | 50.5 $\pm$ 1.7<br>(47.8-53.3) | -                                 | -                                 | 64                         | 58.5 $\pm$ 5.3<br>(51.4-65.6) | 49.7 $\pm$ 2.3<br>(46.5-55.8) |
| Max. body diam.          | 25 $\pm$ 4.1<br>(21-35)       | 32 $\pm$ 3.4<br>(24-35)       | 32 $\pm$ 8.2<br>(26-51)       | 35 $\pm$ 13.0<br>(25-66)       | 35 $\pm$ 5.5<br>(29-45)       | 34 $\pm$ 5<br>(25-44)         | -                                 | -                                 | 21                         | 20 $\pm$ 0.9<br>(18-21)       | 21 $\pm$ 0.8<br>(19-22)       |
| Stoma diam.              | 4.4 $\pm$ 0.6<br>(3.4-5.3)    | 4.2 $\pm$ 0.6<br>(3.4-4.8)    | -                             | -                              | 5.0 $\pm$ 0.8<br>(4.0-6.0)    | 5.0 $\pm$ 0.9<br>(4.0-7.0)    | -                                 | -                                 | -                          | -                             | -                             |
| Stoma length             | 22 $\pm$ 1.2<br>(20-23)       | 22 $\pm$ 1.1<br>(20-24)       | 23 $\pm$ 1.4<br>(20-25)       | 23 $\pm$ 2.4<br>(20-28)        | 26 $\pm$ 3.4<br>(21-30)       | 27 $\pm$ 5.7<br>(15-34)       | 22.5 $\pm$ 1.6<br>(20-25)         | 22.9 $\pm$ 1.5<br>(21-26)         | 21                         | 20.1 $\pm$ 0.8<br>(19-21)     | 21.9 $\pm$ 1.1<br>(20-23)     |
| Anterior pharynx length  | 130 $\pm$ 6.8<br>(120-142)    | 125 $\pm$ 7.3<br>(115-138)    | 126 $\pm$ 8.0<br>(112-134)    | 139 $\pm$ 24<br>(102-178)      | 168 $\pm$ 28<br>(10-240)      | 174 $\pm$ 17<br>(150-200)     | 131.1 $\pm$ 12.8<br>(110-150)     | 138.7 $\pm$ 12.1<br>(119-160)     | 139                        | 132 $\pm$ 10<br>(110-146)     | 135.5 $\pm$ 5.4<br>(129-148)  |
| Posterior pharynx length | 74 $\pm$ 4.8<br>(63-80)       | 76 $\pm$ 5.1<br>(70-85)       | 81 $\pm$ 7.3<br>(68-92)       | 82 $\pm$ 14<br>(43-98)         | 73 $\pm$ 10<br>(50-85)        | 75 $\pm$ 17<br>(50-110)       | 78.9 $\pm$ 7.5<br>(71-90)         | 83.2 $\pm$ 4<br>(77-89)           | 54                         | 56 $\pm$ 6<br>(47-69)         | 57.7 $\pm$ 11.1<br>(46-85)    |

|                                         |                        |                         |                           |                        |                           |                       |                           |                           |      |                         |                         |
|-----------------------------------------|------------------------|-------------------------|---------------------------|------------------------|---------------------------|-----------------------|---------------------------|---------------------------|------|-------------------------|-------------------------|
| Ratio of anterior and posterior pharynx | 1.8 ± 0.1<br>(1.6-2.0) | 1.7 ± 0.1<br>(1.5-1.7)  | 1.6 ± 0.1<br>(1.4-1.7)    | 1.7 ± 0.3<br>(1.4-2.4) | -                         | -                     | 1.7 ± 0.1<br>(1.5-1.8)    | 1.7 ± 0.1<br>(1.5-1.8)    | 2.57 | 2.26 ± 0.3<br>(1.6-2.7) | 2.42 ± 0.4<br>(1.6-2.9) |
| Nerve ring from anterior end            | 177 ± 10<br>(162-189)  | 172 ± 10<br>(156-188)   | 188 ± 13<br>(177-214)     | 202 ± 33<br>(143-252)  | -                         | -                     | -                         | -                         | 186  | 178 ± 8<br>(157-186)    | 187 ± 8<br>(178-203)    |
| Excretory pore from anterior end        | 190 ± 12<br>(167-210)  | 186 ± 13<br>(170-206)   | 217 ± 19<br>(202-261)     | 235 ± 49<br>(166-321)  | -                         | 228 ± 17<br>(206-252) | 196.4 ± 14.1<br>(177-215) | 198.5 ± 19.6<br>(172-224) | 207  | 196 ± 7<br>(183-207)    | 180 ± 10<br>(163-196)   |
| Testis length                           | 408 ± 71<br>(327-561)  | -                       | 1334 ± 409<br>(1050-2260) | -                      | 1493 ± 168<br>(1225-1750) | -                     | -                         | -                         | 851  | 746 ± 86<br>(614-866)   | 362 ± 45<br>(312-423)   |
| Anterior ovary length                   | -                      | 76 ± 11<br>(58-93)      | -                         | 294 ± 174<br>(150-603) | -                         | 233 ± 44<br>(170-325) | -                         | -                         | -    | -                       | 360 ± 46<br>(308-426)   |
| Posterior ovary length                  | -                      | 85 ± 17<br>(65-115)     | -                         | 268 ± 141<br>(160-560) | -                         | 230 ± 54<br>(130-350) | -                         | -                         | -    | -                       | 362 ± 45<br>(312-423)   |
| Anal or cloacal body diam.              | 19 ± 1.8<br>(16-21)    | 15 ± 1.3<br>(13.5-17.5) | 22 ± 3.3<br>(19-30)       | 23 ± 6.4<br>(17-35)    | 24 ± 2.8<br>(21-29)       | 20 ± 2.9<br>(17-28)   | -                         | -                         | 14   | 16 ± 1.8<br>(13-19)     | 13.7 ± 0.4<br>(13-14)   |
| Tail length                             | 60 ± 4.5<br>(51-65)    | 53 ± 4.7<br>(46-59)     | 110 ± 11<br>(98-136)      | 207 ± 27<br>(163-256)  | 101 ± 8.7<br>(88-116)     | 118 ± 13<br>(92-138)  | 118 ± 12.7<br>(95-137)    | 245.8 ± 41.1<br>(177-298) | 99   | 110 ± 6<br>(99-118)     | 151 ± 28<br>(108-189)   |
| Spicule (curved)                        | 27 ± 2.4<br>(24-30)    | -                       | 27 ± 2.1<br>(25-32)       | -                      | 25 ± 3.6<br>(18-28)       | -                     | 20.7 ± 2.1<br>(19-25)     | -                         | 19   | 19 ± 1.0<br>(17-20)     | -                       |
| Spicule (chord)                         | 23 ± 2.0<br>(20-26)    | -                       | 24 ± 2.0<br>(23-29)       | -                      | 24 ± 3.8<br>(17-30)       | -                     | -                         | -                         | 18   | 18 ± 1.0<br>(16-19)     | -                       |
| Gubernaculum length                     | 11 ± 0.7<br>(10-12)    | -                       | 15.0 ± 1.0<br>(13-16)     | -                      | -                         | -                     | 11.7 ± 1.3<br>(10-14)     | -                         | 10   | 12 ± 1<br>(10-14)       | -                       |

**Table 4.** Morphometrics of *Pristionchus glomerata* n. sp. collected from *Ficus racemosa* of Southern India. All measurements are in  $\mu\text{m}$  and in the form: mean  $\pm$  s.d. (range).

| Character                                 | <i>Pristionchus glomerata</i> n. sp. |                                       |                                      |
|-------------------------------------------|--------------------------------------|---------------------------------------|--------------------------------------|
|                                           | Male                                 |                                       | Female                               |
|                                           | Holotype<br>( $\epsilon$ morph)      | Paratypes                             | Paratypes                            |
| n                                         |                                      | 9                                     | 10                                   |
| L                                         | 1253.2                               | 1185.6 $\pm$ 122.6<br>(1023.8-1411.8) | 1067.7 $\pm$ 257.6<br>(693.4-1539.5) |
| a                                         | 57.2                                 | 53.3 $\pm$ 6.7<br>(31.1-66.8)         | 51.8 $\pm$ 10.7<br>(37.7-68.2)       |
| b                                         | 6.7                                  | 6.5 $\pm$ 0.6<br>(5.6-7.6)            | 5.9 $\pm$ 1.2<br>(4.3-7.9)           |
| c                                         | 8.8                                  | 9.3 $\pm$ 1.0<br>(8.2-11.5)           | 7.5 $\pm$ 0.9<br>(5.8-9)             |
| c'                                        | 7.6                                  | 7.1 $\pm$ 0.5<br>(6.5-7.8)            | 9.2 $\pm$ 1.9<br>(7.1 -12)           |
| T or V                                    | 62.3                                 | 61.2 $\pm$ 4.8<br>(54-68.8)           | 51.3 $\pm$ 5.6<br>(37.9-58.7)        |
| Max. body diam.                           | 21.9                                 | 21.6 $\pm$ 1.5<br>(10.1-24.1)         | 20.9 $\pm$ 2.9<br>(16.6-24.6)        |
| Stoma length                              | 7.6                                  | 12.5 $\pm$ 6.2<br>(6.3-18.4)          | 7.7 $\pm$ 2.9<br>(5.1 -14.9)         |
| Anterior pharynx length                   | 110.9                                | 109.8 $\pm$ 4.3<br>(104.2-119.4)      | 101.5 $\pm$ 13.0<br>(90.3-128.2)     |
| Posterior pharynx length                  | 74                                   | 73.7 $\pm$ 4.2<br>(68.1-82.3)         | 75.6 $\pm$ 10.8<br>(59.2-87.1)       |
| Ratio of anterior and posterior pharynx   | 1.5                                  | 1.46 $\pm$ 0.04<br>(1.4-1.5)          | 1.36 $\pm$ 0.15<br>(1.1 -1.5)        |
| Neck length (head to the base of pharynx) | 192.5                                | 196.0 $\pm$ 9.7<br>(185.5-217.5)      | 184.85 $\pm$ 21.4<br>(158.6-230.2)   |
| Excretory pore from anterior end          | 53.4                                 | 59.4 $\pm$ 6.9<br>(52.4-75.4)         | 51.9 $\pm$ 5.7<br>(46.4-63.7)        |
| Anterior ovary length                     | -                                    | -                                     | 226.3 $\pm$ 44.9<br>(178.8-314.6)    |
| Posterior ovary length                    | -                                    | -                                     | 268.3 $\pm$ 55.9<br>(325.1-187.2)    |
| Testis length                             | 780.3                                | 728 $\pm$ 112.9<br>(562.8-910.5)      | -                                    |
| Vulva to anus distance                    | -                                    | -                                     | 392.6 $\pm$ 170.5<br>( 783.7 -196.6) |
| Anal or cloacal body diam.                | 18.7                                 | 17.9 $\pm$ 1.4<br>(16.1-21.4)         | 15.4 $\pm$ 1.8<br>(12.2-16.8)        |
| Tail length                               | 142.4                                | 126.9 $\pm$ 9.3<br>(113.4-142.4)      | 139.9 $\pm$ 23.7<br>(117.0-172.6)    |
| Spicule (curved)                          | 21.2                                 | 21.42 $\pm$ 0.5<br>(20.2-22.4)        | -                                    |
| Spicule (chord)                           | 17.2                                 | 17.3 $\pm$ 0.1<br>(17.1-17.6)         | -                                    |
| Gubernaculum length                       | 16.5                                 | 16.4 $\pm$ 0.1<br>(16.2-16.8)         | -                                    |
